1  
2  
3  
4  
5  
6  
7  
8  
9  
10  
11  
12  
13  
14  
15  
16  
17  
18  
19  
20  
21  
22  
23  
24  
25  
26  
27  
28  
29

Multi-omics co-localization with genome-wide association studies reveals a context-specific genetic mechanism at a childhood onset asthma risk locus

Marcus M. Soliai<sup>1,2\*</sup>, Atsushi Kato<sup>3</sup>, Catherine T. Stanhope<sup>2</sup>, James E. Norton<sup>3</sup>, Katherine A. Naughton<sup>2</sup>, Aiko I. Klinger<sup>3</sup>, Robert C. Kern<sup>4</sup>, Bruce K. Tan<sup>4</sup>, Robert P. Schleimer<sup>3</sup>, Dan L. Nicolae<sup>1,2,5,6</sup>, Jayant M. Pinto<sup>7</sup>, Carole Ober<sup>1,2\*</sup>

<sup>1</sup>Committee on Genetics, Genomics and Systems Biology, University of Chicago, Chicago, IL, United States of America

<sup>2</sup>Departments of Human Genetics, University of Chicago, Chicago, IL, United States of America

<sup>3</sup>Departments of Medicine, Northwestern University Feinberg School of Medicine, Chicago, IL, United States of America

<sup>4</sup>Department of Otolaryngology-Head and Neck Surgery, Northwestern University Feinberg School of Medicine, Chicago, IL, United States of America

<sup>5</sup>Department of Medicine, University of Chicago, Chicago, IL, United States of America

<sup>6</sup>Department of Statistics, University of Chicago, Chicago, IL, United States of America

<sup>7</sup>Department of Surgery, University of Chicago, Chicago, IL, United States of America

\*Corresponding authors

E-mail: [msoliai@uchicago.edu](mailto:msoliai@uchicago.edu) (MS); [c-ober@bsd.uchicago.edu](mailto:c-ober@bsd.uchicago.edu) (CO)

## 32 **Abstract**

### 33 **Background**

34 Genome-wide association studies (GWASs) have identified thousands of variants associated with  
35 asthma and other complex diseases. However, the functional effects of most of these variants are  
36 unknown. Moreover, GWASs do not provide context-specific information on cell types or  
37 environmental factors that affect specific disease risks and outcomes. To address these  
38 limitations, we used an upper airway (sinonasal) epithelial cell culture model to assess  
39 transcriptional and epigenetic responses to an asthma-promoting pathogen, rhinovirus (RV), and  
40 provide context-specific functional annotations to variants discovered in GWASs of asthma.

### 41 **Methods**

42 Using genome-wide genetic, gene expression and DNA methylation data in vehicle- and RV-  
43 treated airway epithelial cells (AECs) from 104 individuals, we mapped *cis* expression and  
44 methylation quantitative trait loci (*cis*-eQTLs and *cis*-meQTLs, respectively) in each condition.  
45 A Bayesian test for co-localization between AEC molecular QTLs and adult onset and childhood  
46 onset GWAS variants was used to assign function to variants associated with asthma. Mendelian  
47 randomization was applied to demonstrate DNA methylation effects on gene expression at  
48 asthma colocalized loci.

### 49 **Results**

50 Co-localization analyses of airway epithelial cell molecular QTLs with asthma GWAS variants  
51 revealed potential molecular disease mechanisms of asthma, including QTLs at the *TSLP* locus  
52 that were common to both exposure conditions and to both childhood and adult onset asthma, as

53 well as QTLs at the 17q12-21 asthma locus that were specific to RV exposure and childhood  
54 onset asthma, consistent with clinical and epidemiological studies of these loci.

## 55 **Conclusion**

56 This study provides information on functional effects of asthma risk variants in airway epithelial  
57 cells and insight into a disease-relevant viral exposure that modulates genetic effects on  
58 transcriptional and epigenetic responses in cells and on risk for asthma in GWASs.

59

60

61

62

63

64

65

66

67

68

69

70

## 71 **Background**

72 Over the past decade, genome-wide association studies (GWASs) have identified over 60  
73 asthma susceptibility loci at genome-wide levels of significance ( $p < 5 \times 10^{-8}$ ) [1], with a locus at  
74 17q12-21 being the most replicated and most significant asthma susceptibility locus in childhood  
75 onset asthma (reviewed in [2]). Although asthma is typically diagnosed based on clinical  
76 symptoms, such as wheeze, cough, and shortness of breath, it is actually comprised of many  
77 overlapping phenotypes and distinct endotypes with shared as well as unique genetic and  
78 environmental risk factors. For example, individuals with asthma differ with respect to age of  
79 onset, environmental triggers of exacerbations, response to medications, obesity, and co-  
80 occurrence with allergic diseases and other conditions. Recently, Pividori et al. reported 61  
81 independent asthma loci, 23 of which were specific to childhood onset asthma, one that was  
82 specific to adult onset asthma, and 37 that were associated with risk for both childhood onset and  
83 adult onset asthma [1]. Gene and tissue enrichment patterns at these risk loci suggested that  
84 epithelial cells (skin) and lung as primary etiological drivers of childhood onset and adult onset  
85 asthma, respectively, while blood (immune) cell gene expression enrichments were shared by  
86 both. However, GWASs do not generally consider tissue- or other environment-specific effects,  
87 or gene by environment interactions. Moreover, epigenetic patterning may mediate the effects of  
88 exposures on gene expression and disease risk, yet such studies have only rarely been integrated  
89 with GWAS of asthma [3].

90 A challenge in interpreting GWAS results is that over 90% of disease-associated variants  
91 are located in non-protein-coding regions of the genome [4], which are enriched for chromatin  
92 signatures suggestive of enhancers [4] and for expression quantitative trait loci (eQTLs) [4-6].  
93 SNPs associated in GWASs that also have functional annotations are more likely to be causal

94 variants, underlying disease pathophysiology through their effects on gene regulation. However,  
95 identifying causal variants and their target genes at associated loci has been challenging, and the  
96 functions of most SNPs associated with diseases in GWASs remain unknown. Databases such as  
97 GTEx, ENCODE, and ROADMAP have been used to annotate GWAS SNPs and predict  
98 molecular mechanisms through which risk variants affect disease phenotypes [3, 6-8]. But while  
99 these resources have provided important insights into the interpretation of GWAS results, they  
100 do not include all cell types relevant to all diseases or information on environmental exposures  
101 that influence disease outcomes. As a result, annotations of asthma GWAS variants have been  
102 largely limited to studies in transformed B cells lines, blood (immune) cells, and whole lung  
103 tissue [1, 9, 10].

104 *In vitro* cell models provide an opportunity to address these limitations by characterizing  
105 genetic and molecular responses to environmental exposures in cells from disease-relevant  
106 tissues, and identifying genotypes that modify these responses [11, 12]. Joint analysis of datasets  
107 (e.g. eQTLs and GWASs) can identify variants associated with both disease risk and molecular  
108 traits as candidate causal variants that contribute to mechanisms of disease pathophysiology. A  
109 multi-trait co-localization method (*moloc*) [13] was developed to integrate summary data from  
110 GWAS and multiple molecular QTL datasets and identify candidate regulatory drivers of  
111 complex phenotypes.

112 Here, we report the results of a multi-omics co-localization study to identify condition-  
113 specific regulatory effects of asthma risk variants using an epithelial cell model of viral response.  
114 Because airway epithelium forms a barrier to inhaled exposures, we used an *in vitro* upper  
115 airway (sinonasal) epithelial cell model of transcriptional and epigenetic responses to rhinovirus  
116 (RV). Primary infection of RV occurs in the nasal epithelium, and RV is a major contributor to

117 asthma inception in young children [14] and asthma exacerbations throughout life [15, 16],  
118 underscoring its importance as a contextual promoter of asthma pathophysiology. We  
119 demonstrate a specific enrichment of childhood onset asthma GWAS SNPs among airway  
120 epithelial molecular QTLs, consistent with the important role that the epithelial barrier plays in  
121 the inception of asthma in childhood [1, 17, 18]. Our integrative multi-omics approach suggests  
122 an environment-specific mechanism of asthma pathogenesis at the 17q12-21 asthma locus in  
123 childhood onset asthma, and a molecular mechanism shared between childhood onset and adult  
124 onset GWASs in the *TSLP* gene at chromosome 5q22, highlighting complementary roles of the  
125 airway epithelium in the pathogenesis of asthma.

126

## 127 **Methods**

### 128 **Ethics statement**

129 Study participants were recruited between March 2012 and August 2015, and nasal specimens  
130 were collected as part of routine endoscopic sinonasal surgeries at Northwestern University  
131 Feinberg School of Medicine. Informed written consent was obtained from each study  
132 participant and randomly generated ID codes were assigned to all samples thereby preserving the  
133 participant's anonymity and privacy. This study was approved by the institutional review boards  
134 at Northwestern University Feinberg School of Medicine and the University of Chicago.

135

### 136 **Sample collection and composition**

137 Sinonasal epithelial cells were obtained by brushing the unciniate process collected at elective  
138 surgery at Northwestern University from 56 males, 39 females, ages 18 – 73 years old (mean age  
139 44), self-reported ethnicities as Caucasian (64%), Black (17%), Hispanic (13%), and “other”

140 (6%), and 43 asthmatics (current or prior status) and 61 non-asthmatics. Blood samples for  
141 genotyping were collected from study participants. A summary of the study design is shown in  
142 Fig. S1.

143

#### 144 **Upper airway epithelial cell culture and RV treatment**

145 After isolation, nasal airway epithelial cells were cultured in bronchial epithelial cell growth  
146 medium (Lonza, BEGM BulletKit, catalog number CC-3170) to near confluence, then frozen at -  
147 80°C and stored in Liquid Nitrogen. Cells were subsequently thawed and cultured in collagen-  
148 coated (PureCol, INAMED BioMaterials, catalog number 5,409, 3 mg/mL, 1:15 dilution) tissue  
149 culture plates (6 wells of 2x 12 well plates) using BEGM overnight at 37°C and 5% CO<sub>2</sub>. In  
150 preparation for rhinovirus (HRV-16; RV) infection/stimulation, plates at 50-60% confluency  
151 were incubated overnight in BEGM without hydrocortisone (HC) followed by a two-hour RV  
152 infection at a multiplicity of infection (MOI) of 2 and vehicle treatment (Bronchial epithelial cell  
153 basal medium (BEBM) + Gentamicin/Amphotericin) at 33°C (low speed rocking, ~15 RPM).  
154 RV- and vehicle-treated cells were washed and then were cultured at 33°C for 46 hours (48 hours  
155 total) in BEGM without HC.

156

#### 157 **Genotyping and imputation**

158 DNA was extracted from whole blood or sinus tissue (if no blood was available) with the  
159 Macherey-Nagel NucleoSpin Blood L or NucleoSpin Tissue L Extraction kits, respectively, and  
160 quantified with the NanoDrop ND1000. Genotyping of all study participants was performed  
161 using the Illumina Infinium HumanCore Exome+Custom Array (550,224 SNPs). After quality  
162 control (QC) (excluding SNPs with HWE < 0.0001 by race/ethnicity, call rate < 0.95, MAF <

163 0.05 and individuals with genotype call rates  $< 0.05$ ), 529,993 markers for 104 individuals were  
164 available for analysis. Ancestry principal component analysis (PCA) was performed using 676  
165 ancestry informative markers included on the array that overlap with the HapMap release 3 (Fig.  
166 S2).

167         Phasing and imputation were performed using the ShapeIt2 [19] and Impute2 [20]  
168 software packages, respectively. Variants were imputed in 5 Mb windows across the genome  
169 against the 1000 Genomes Phase 3 haplotypes (Build 37; October 2014). Individuals were  
170 categorized into two groups based on the k-means clustering of ancestry PCs, using the `kmeans()`  
171 function in R; individuals were grouped as European or African American based on how they  
172 related to the HapMap reference panel and means clustering of their ancestry PCs (Fig. S2).  
173 After imputation, both groups were merged and QC was performed with `gtool` [21]. X and Y  
174 chromosome-linked SNPs and SNPs that did not meet the QC criteria (info score  $< 0.8$ , MAF  $<$   
175  $0.05$ , missingness  $> 0.05$  and a probability score  $< 0.9$ ) were excluded from analyses. Probability  
176 scores were converted to dosages for 6,665,552 of the remaining sites used in downstream  
177 analyses.

178

### 179 **RNA extraction and sequencing**

180 Following RV and vehicle treatments, RNA from cells underwent extraction and purification  
181 using the QIAGEN AllPrep DNA/RNA Kit. RNA quality and quantity were measured at the  
182 University of Chicago Functional Genomics Core using the Agilent RNA 6000 Pico assay and  
183 the Agilent 2100 Bioanalyzer. RNA integrity numbers (RIN) were greater than 7.7 for all  
184 samples. cDNA libraries were constructed using the Illumina TruSeq RNA Library Prep Kit v2  
185 and sequenced on the Illumina HiSeq 2500 System (50 bp, single-end); RNA sequencing was



186 completed at the University of Chicago Genomics Core. Subsequently, we checked for potential  
187 sample contamination and sample swaps using the publicly available software VerifyBamID  
188 (<http://genome.sph.umich.edu/wiki/VerifyBamID>) [22] for cells from all 104 individuals  
189 included in each treatment condition. We did not detect any cross-contamination between  
190 samples but we did identify one sample swap between individuals, which we subsequently  
191 corrected.

192 Sequences were mapped to the human reference genome (hg19) and reads per gene were  
193 quantified using the Spliced Transcripts Alignment to a Reference (STAR) [23] software. X,Y,  
194 and mitochondrial chromosome genes, and low count data (genes < 1CPM) were removed prior  
195 to normalization via the trimmed mean of M-values method (TMM) and variance modeling  
196 (voom) [24]; samples contain > 8M mapped reads. Principle components analysis (PCA)  
197 identified biological and technical sources of variation in the voom-normalized RNA-seq reads.  
198 We identified contributors to batch and other technical effects (days in liquid nitrogen,  
199 experimental culture days, cell culture batches, RNA concentration, RNA fragment length,  
200 technician, sequencing pool). Additionally, unknown sources of variation were predicted with  
201 the Surrogate Variable Analysis (SVA) [25] package in R where 15 surrogate variables (SVs)  
202 were estimated for the samples that were included in the experiment. Voom-normalized RNA-  
203 seq data were then adjusted for technical effects, SVs, sex, and ancestry PCs (1-3) using the  
204 function `removeBatchEffect()` from the R package `limma` [26]. Treatment responses in epithelial  
205 cells were detected in the combined sample with 6,650 differentially expressed genes identified  
206 at a  $FDR \leq 0.01$  (Fig. S3).

207

208 **DNA extraction and methylation profiling**

209 Following RV and vehicle treatments, DNA was extracted from cells as described above. DNA  
210 methylation profiles for cells from each treatment were measured on the Illumina Infinium  
211 MethylationEPIC BeadChip at the University of Chicago Functional Genomics Core.  
212 Methylation data were preprocessed using the minfi package [27]. Probes located on sex  
213 chromosomes and with detection p-values greater than 0.01 in more than 10% of samples were  
214 removed from the analysis; samples with more than 5% missing probes were also removed. A  
215 preprocessing control normalization function was applied to correct for raw probe values or  
216 background and a Subset-quantile Within Array Normalization (SWAN) [28] was used to correct  
217 for technical differences between the Infinium type I and type II probes. Additionally, we  
218 removed cross-reactive probes and probes within two nucleotides of a SNP with an MAF greater  
219 than 0.05 using the function rmSNPandCH() from the R package DMRcate [29].

220 PCA identified technical and biological sources of variation in the normalized DNA  
221 methylation datasets. We identified contributors to batch and technical effects including array,  
222 and cell harvest date. Sex, age, and smoking were significant variables in the PCA. Unknown  
223 sources of variation were predicted with the SVA package where we estimated 37 SVs. SWAN  
224 and quantile-normalized M-values were then adjusted for batch and technical effects, SVs, sex,  
225 age, and smoking using the function removeBatchEffect() in R. Treatment effects were detected  
226 in the combined sample with 1,710 differentially methylated CpGs at a FDR<0.10 (Fig. S4).

227

### 228 **eQTL and meQTL analyses**

229 Prior to e/meQTL analysis, voom-transformed gene expression values and normalized  
230 methylation M-values were adjusted for technical (array, cell harvest date), biological variables  
231 (sex, age, ancestry PCs), as well as smoking and surrogate variables as described above. Linear

232 regression between the permuted genotypes (MAF>0.05) and molecular phenotypes (gene  
233 expression and methylation residuals) from each treatment condition was performed with the  
234 FastQTL [30] software package within *cis*-window sizes of 1 Mb and 10 kb for eQTL and  
235 meQTL analyses, respectively. Nominal passes were conducted for each eQTL and meQTL  
236 analysis within FastQTL, and an FDR threshold of 0.10 was applied to adjust for multiple testing  
237 within each experimental dataset with the `p.adjust()` function in R.

238 A conditional analysis was performed with the QTLtools [31] software package to  
239 identify molecular QTLs with independent effects on gene expression and DNA methylation.  
240 This was accomplished in two-steps. First, a permutation analysis was performed within a *cis*-  
241 window sizes of 1 Mb and 10 kb for eQTL and meQTL analyses, respectively, to derive nominal  
242 p-value thresholds per molecular phenotype. Second, a forward-backward stepwise regression is  
243 applied to ultimately assign significant variants to independent signals.

244

#### 245 **Multivariate adaptive shrinkage analysis (mash)**

246 An Empirical Bayes method of multivariate adaptive shrinkage was applied separately to the  
247 eQTL and meQTL data sets as implemented in the R statistical package, `mashr`  
248 (<https://github.com/stephenslab/mashr>) [32], to produce improved estimates of QTL effects and  
249 corresponding significance values in each treatment condition. Mashr implements this in two  
250 general steps: 1) identification of pattern sharing, sparsity, and correlation among QTL effects,  
251 and 2) integration of these learned patterns to produce improved effects estimates and measures  
252 of significance for eQTLs or meQTLs in each treatment condition. To fit the mash model, we  
253 first estimated the correlation structure in the null test from a random dataset in which 235,851  
254 and 3,959,482 phenotype-SNP pairs were chosen for eQTLs and meQTLs, respectively, from the

255 FastQTL nominal pass; because mashr is computationally intensive, the number of randomly  
256 chosen gene/CpG-SNP pairs were determined based on R's memory capabilities. The data-  
257 driven covariances were then estimated using the 'top' mQTL in each gene or CpG results from  
258 FastQTL. Posterior summaries were then computed for the 'top' eQTL and meQTL results (see  
259 [32]). The instructions found in the *mashr* eQTL analysis outline vignette were followed to run  
260 mash.

261

## 262 **Enrichment analysis**

263 The R package, GWAS analysis of regulatory or functional information enrichment with LD  
264 correction (GARFIELD) [33], was used to quantify enrichment and assess significance of  
265 GWAS SNPs among eQTLs and meQTLs. GARFIELD leverages GWAS results with molecular  
266 data to identify features relevant to a phenotype of interest, while accounting for LD and  
267 matching for genotyped variants, by applying a logistic regression method to derive statistical  
268 significance for enrichment. For this study, molecular QTLs were tested for GWAS variant  
269 enrichment, estimated as odds ratios and enrichment P-values derived at four GWAS P-value  
270 thresholds:  $10^{-5}$ ,  $10^{-6}$ ,  $10^{-7}$ , and  $10^{-8}$ . To demonstrate disease-specificity of our results, we  
271 selected summary statistics from four GWASs performed in UK Biobank subjects (Alzheimer's  
272 disease [34], atrial fibrillation [35], height [36], neuroticism [37], in addition to one each for  
273 adult onset and childhood onset asthma [1]). Summary statistics from these six GWASs were  
274 used for enrichment analyses of the 755,441 molecular QTLs combined from each treatment  
275 condition. These non-asthma GWASs were chosen based on similar population backgrounds  
276 (European), availability of summary statistics (as of 05/18), and not known or expected to have

277 overlapping genetics with asthma (i.e., excluding diseases with known allergic or autoimmune  
278 etiologies).

279 To assess tissue-specificity of our results, we examined eQTLs from the adrenal gland,  
280 frontal cortex, hypothalamus, ovary, and testis from the GTEx database version 7  
281 (<http://gtexportal.org>) [6], and tested for enrichment of adult onset and childhood onset asthma  
282 GWAS SNPs among the epithelial eQTLs from our study combined across treatment conditions.  
283 GTEx data were matched with respect to sample size and number of eQTLs with those of the  
284 epithelium, with the exception of testis, which was included to show the consistency of the  
285 enrichment results despite it being an outlier in regards to both sample size, which was smaller,  
286 and number of eQTLs, which was larger. An FDR threshold of 5% and 10% was applied to  
287 eQTLs from GTEx and from our study, respectively, for a balanced, unbiased assessment of  
288 enrichment. An  $OR > 1$  and a Benjamini-Hochberg (BH) corrected p-value threshold of  $< 0.05$   
289 was used as the significance threshold for enrichment; BH adjusted p-values were calculated  
290 using the `p.adjust()` function in R where ‘n’ was determined by the number of tests in each  
291 respective enrichment analysis.

292

### 293 **Co-localization analysis**

294 To estimate the posterior probability association (PPA) that a SNP contributed to the association  
295 signal in the GWAS as well as to the eQTL and/or meQTL, we applied a Bayesian statistical  
296 framework implemented in the R package *multiple-trait-coloc* (*moloc*) [13]. Summary data from  
297 adult onset and childhood onset asthma GWASs from [1], along with eQTL and meQTL  
298 summary data from cells within each treatment condition (described above), were included in the  
299 *moloc* analysis. Each co-localization analysis included summary data from a GWAS and

300 epithelial cell eQTLs and meQTLs from corresponding treatment conditions. Because a genome-  
301 wide co-localization analysis was computationally untenable, genomic regions for co-  
302 localization were defined using GARFIELD. First, we analyzed the enrichment pattern of  
303 e/meSNPs from each treatment condition in adult onset and childhood onset GWASs using the  
304 default package settings. Second, we extracted variants driving the enrichment signals at a  
305 GWAS p-value threshold of  $1 \times 10^{-4}$ . Regions were defined as 2 Mb windows centered around  
306 these variants. Only regions with at least 10 SNPs in common between all three datasets or  
307 ‘traits’ (GWAS, eQTL, and meQTL) were assessed by moloc and 15 ‘configurations’ of possible  
308 variant sharing was computed across these three traits (see [13] for more details). PPAs  $\geq 0.70$   
309 were considered as evidence for co-localization. Prior probabilities of  $1 \times 10^{-4}$ ,  $1 \times 10^{-6}$ , and  $1 \times 10^{-7}$   
310 were chosen for the association of one, two, or three traits, respectively, as recommended by the  
311 authors of moloc.

312

### 313 **Mendelian randomization**

314 Mendelian Randomization was performed using the `ivreg2` function in R ([https://www.r-  
315 bloggers.com/an-ivreg2-function-for-r/](https://www.r-bloggers.com/an-ivreg2-function-for-r/)) which applies a 2-stage least squares regression (2SLS),  
316 as implemented in [38]. We used the only co-localized triplet (eQTL-meQTL-GWAS) to assess  
317 the causal effects of DNA methylation (cg17401724) on gene expression (*ERBB2*), using the  
318 genotype at rs66826786 as the instrumental variable.

319

## 320 **Results**

### 321 **Genome-wide *cis*-eQTLs and *cis*-meQTLs mapping in cultured airway epithelial cells**

322 To identify genetic variation influencing gene expression under different conditions, we  
323 performed eQTL mapping in cultured AECs exposed to RV, and its corresponding vehicle  
324 control from 104 individuals (43 with doctor diagnosed asthma; 61 without a doctor's diagnosis  
325 of asthma; Fig. S1). Analyses were performed separately for each treatment condition, testing for  
326 associations with 6,665,552 imputed SNPs (MAF>0.05) and 11,231 autosomal genes (see  
327 Methods; Additional file 1 and 2). The numbers of SNPs associated with gene expression for at  
328 least one gene (eQTLs) and genes with at least one eQTL (eGenes), in any treatment, are  
329 summarized in Fig. S5.

330 In parallel, we performed meQTL mapping in the same cells used for gene expression  
331 studies. We performed this analysis separately for each treatment condition, testing for  
332 associations with the same imputed SNP set that was used for eQTL mapping and interrogated  
333 791,765 autosomal CpGs (Additional file 3 and 4). A summary of the number of SNPs  
334 associated with methylation levels at one or more CpG sites (meQTLs) and CpG sites with at  
335 least one meQTL (meCpGs), in any treatment, are shown in Fig. S5.

336 Each gene/CpG-variant pair was tested for a linear regression slope that significantly  
337 deviated from 0. Therefore, the estimated effects for the molecular QTLs reflects both the single-  
338 SNP effects of each molecular QTL as well as those that are in linkage disequilibrium (LD).  
339 Accordingly, these analyses do not differentiate between causal molecular QTLs from those in  
340 LD with the QTL. However, these variants are still informative in prioritizing genes and CpG  
341 sites that contribute to the etiology of asthma.

342

343 **Estimating shared and condition-specific molecular QTL effects**

344 After identifying molecular QTLs in each treatment condition, we first explored the impact of  
345 RV exposure on eQTLs and meQTLs by comparing RV-treated to vehicle-treated results. For  
346 this analysis, we used an empirical Bayes method, multivariate adaptive shrinkage (*mash*; see the  
347 “Methods” section) [32]. Compared to direct comparisons between conditions, *mash* increases  
348 power, improves effect-size estimates, and provides better quantitative assessments of effect size  
349 heterogeneity of molecular QTLs, thereby allowing for greater confidence in effect sharing and  
350 estimates of condition-specificity. Additionally, as a confidence measurement of the direction of  
351 QTL effects, *mash* provides a ‘local false sign rate’ (lfsr) that is the probability that the estimated  
352 effect has the incorrect sign [39], rather than the expected proportion of Type I errors as would  
353 be assessed using FDR thresholds.

354 To identify condition-specific eQTLs, we analyzed the effect estimates of the most  
355 significant eQTL for each of 11,231 genes and assessed sharing of these signals among the RV  
356 and vehicle treated cells (see Methods). A pairwise comparison showed that 58.3% of eQTLs  
357 were shared between RV and vehicle treatments, representing 1,564 eGenes, defined here as  
358 genes with at least one eQTL at a lfsr < 0.05 (Fig. 1A; Additional file 5). We observed 660 and  
359 458 condition-specific eGenes in the vehicle- and RV-treated cells, respectively. These  
360 potentially represent genetic variants that modify responses to viral exposure in AECs. Examples  
361 of treatment-specific eQTLs are shown in Fig. 1B. The effect estimates of the most significant  
362 meQTL for each of 751,914 CpG sites were used to identify condition-specific DNA methylation  
363 effects, as described above for eQTLs. A pair-wise analysis of meQTLs revealed that 89.9% of  
364 meQTLs were shared between vehicle and RV treatments, representing 48,189 meCpGs, defined  
365 here as CpGs with at least one meQTL at a lfsr < 0.05 (Fig. 1C; Additional file 6), revealing a



366 much greater proportion shared meQTLs than those observed for eQTLs. Examples of the 5,416  
367 treatment-specific meQTLs are shown in Fig. 1D.

368 In total, we identified 660 and 458 eGenes ( $\text{lfsr} < 0.05$ ) that were specific to vehicle or RV  
369 treatment, respectively, and 5,162 and 254 meCpGs that were specific to vehicle or RV culture  
370 treatment, respectively, with greater confidence than by pairwise comparisons using FDR  
371 thresholds [32].

372

### 373 **Molecular QTLs in the airway epithelium are enriched for asthma GWAS SNPs**

374 Although the majority of variation in the human genome is non-functional [40], GWAS loci tend  
375 to be most enriched for functional annotations in disease-relevant cells [4, 41, 42]. To assess  
376 whether the 755,441 molecular QTLs identified in our study (i.e., the union of eQTLs and  
377 meQTLs from each treatment condition at  $\text{FDR} < 0.10$ ) are enriched for GWAS variants and  
378 whether these enrichments show tissue specificity, we first extracted summary statistics from a  
379 publicly available GWAS data for childhood onset and adult onset asthma [1] and for four  
380 diseases without known allergic or autoimmune etiologies (Alzheimer's disease [34], atrial  
381 fibrillation [35], height [36], and neuroticism [37]). There were statistically significant  
382 enrichments ( $\text{OR} > 1$  and BH-adjusted  $\text{P-value} < 0.05$ ; see Methods) for the childhood and adult  
383 onset asthma GWAS SNPs among the molecular QTLs at each of four GWAS thresholds (Table  
384 1), consistent with the strong epithelial cell involvement in asthma in general and with childhood  
385 onset asthma in particular. In contrast, there were no significant enrichments for SNPs from four  
386 of the other GWASs among the epithelial cell molecular QTLs. These results highlight the  
387 specific enrichment of asthma GWAS SNPs among airway epithelial molecular QTLs compared  
388 to SNPs from GWASs of diseases without known epithelial cells involvement.

389

**Table 1.** Enrichment estimates of airway epithelial cell molecular QTLs for GWAS SNPs. *P*-values that are significant after BH correction (see Methods) are shown in bolded type.

| GWAS                       | N <sub>Cases</sub> | N <sub>Controls</sub> | N <sub>Total</sub> | GWAS Threshold           | OR          | P                           |
|----------------------------|--------------------|-----------------------|--------------------|--------------------------|-------------|-----------------------------|
| Alzheimer's Disease [34]   | 47,793             | 328,320               | 376,311            | 1x10 <sup>-5</sup>       | 0.78        | 3.95x10 <sup>-1</sup>       |
|                            |                    |                       |                    | 1x10 <sup>-6</sup>       | 0.81        | 5.47x10 <sup>-1</sup>       |
|                            |                    |                       |                    | 1x10 <sup>-7</sup>       | 0.80        | 5.74x10 <sup>-1</sup>       |
|                            |                    |                       |                    | 1x10 <sup>-8</sup>       | 0.53        | 2.03x10 <sup>-1</sup>       |
| Atrial Fibrillation [35]   | 60,620             | 970,216               | 1,030,836          | 1x10 <sup>-5</sup>       | 1.14        | 4.73x10 <sup>-1</sup>       |
|                            |                    |                       |                    | 1x10 <sup>-6</sup>       | 1.07        | 1.71x10 <sup>-1</sup>       |
|                            |                    |                       |                    | 1x10 <sup>-7</sup>       | 1.12        | 6.89x10 <sup>-1</sup>       |
|                            |                    |                       |                    | 1x10 <sup>-8</sup>       | 1.48        | 2.64x10 <sup>-1</sup>       |
| Height [36]                | NA                 | NA                    | 253,288            | 1x10 <sup>-5</sup>       | 1.23        | 2.49x10 <sup>-1</sup>       |
|                            |                    |                       |                    | 1x10 <sup>-6</sup>       | 1.38        | 1.43x10 <sup>-1</sup>       |
|                            |                    |                       |                    | 1x10 <sup>-7</sup>       | 1.50        | 1.22x10 <sup>-1</sup>       |
|                            |                    |                       |                    | 1x10 <sup>-8</sup>       | 1.51        | 1.56x10 <sup>-1</sup>       |
| Neuroticism [37]           | 130,664            | 330,470               | 461,134            | 1x10 <sup>-5</sup>       | 1.35        | 1.10x10 <sup>-1</sup>       |
|                            |                    |                       |                    | 1x10 <sup>-6</sup>       | 1.72        | 3.84x10 <sup>-2</sup>       |
|                            |                    |                       |                    | 1x10 <sup>-7</sup>       | 3.52        | 3.28x10 <sup>-3</sup>       |
|                            |                    |                       |                    | 1x10 <sup>-8</sup>       | 9.09        | 2.23x10 <sup>-3</sup>       |
| Adult Onset Asthma [1]     | <b>21,564</b>      | <b>318,237</b>        | <b>339,801</b>     | <b>1x10<sup>-5</sup></b> | <b>5.09</b> | <b>7.07x10<sup>-5</sup></b> |
|                            |                    |                       |                    | <b>1x10<sup>-6</sup></b> | <b>5.36</b> | <b>1.86x10<sup>-3</sup></b> |
|                            |                    |                       |                    | 1x10 <sup>-7</sup>       | 8.11        | 2.18x10 <sup>-3</sup>       |
|                            |                    |                       |                    | <b>1x10<sup>-8</sup></b> | <b>19.3</b> | <b>1.16x10<sup>-3</sup></b> |
| Childhood Onset Asthma [1] | <b>9,433</b>       | <b>318,237</b>        | <b>327,670</b>     | <b>1x10<sup>-5</sup></b> | <b>2.92</b> | <b>2.97x10<sup>-6</sup></b> |
|                            |                    |                       |                    | <b>1x10<sup>-6</sup></b> | <b>4.77</b> | <b>1.23x10<sup>-7</sup></b> |
|                            |                    |                       |                    | <b>1x10<sup>-7</sup></b> | <b>5.42</b> | <b>9.44x10<sup>-7</sup></b> |
|                            |                    |                       |                    | <b>1x10<sup>-8</sup></b> | <b>4.05</b> | <b>1.64x10<sup>-4</sup></b> |

390

391 To further assess the specificity of airway epithelial molecular QTLs to asthma, we  
 392 compared GWAS SNP enrichments among the eQTLs in our study to those from tissues that are  
 393 not known to be involved in asthma. To this end, we tested for enrichment of asthma GWAS  
 394 SNPs among eQTLs (FDR<0.05) in five different tissues from the GTEx database (adrenal,  
 395 frontal cortex, hypothalamus, ovary, testis) [43], and compared them to enrichments among the  
 396 eQTLs from our study. We observed a significant enrichment (OR>1 and BH-adjusted P<0.05)

397 of childhood onset asthma GWAS SNPs among the epithelial cell eQTLs at all GWAS P-value  
 398 thresholds  $\leq 1 \times 10^{-7}$  (Table 2), while enrichments for adult onset asthma GWAS SNPs among the  
 399 epithelial cell eQTLs were not observed at any GWAS threshold (Table S1). Except for the  
 400 hypothalamus, which showed some enrichment at  $P < 10^{-5}$ ), no other enrichments of asthma  
 401 GWAS SNPs were observed among eQTLs in other tissues, further supporting the specificity of  
 402 our model and previous studies suggesting that epithelial barrier defects underlie risk for  
 403 childhood onset, but not adult onset, asthma [1, 17, 18].  
 404

**Table 2.** Enrichment estimates of eQTLs for childhood onset asthma GWAS SNPs from six tissues. Significant *P*-values after BH correction are shown in bolded type. Results for adult onset asthma is shown in Table S1.

| Tissue                         | GWAS Threshold                       | OR          | P                                       | N          | N <sub>eSNP</sub> |
|--------------------------------|--------------------------------------|-------------|-----------------------------------------|------------|-------------------|
| Adrenal                        | $1 \times 10^{-5}$                   | 1.32        | $1.84 \times 10^{-1}$                   | 175        | 588,348           |
|                                | $1 \times 10^{-6}$                   | 1.02        | $9.51 \times 10^{-1}$                   |            |                   |
|                                | $1 \times 10^{-7}$                   | 0.74        | $3.91 \times 10^{-1}$                   |            |                   |
|                                | $1 \times 10^{-8}$                   | 1.05        | $8.97 \times 10^{-1}$                   |            |                   |
| Brain - Frontal Cortex         | $1 \times 10^{-5}$                   | 1.72        | $2.02 \times 10^{-2}$                   | 118        | 367,312           |
|                                | $1 \times 10^{-6}$                   | 1.33        | $3.46 \times 10^{-1}$                   |            |                   |
|                                | $1 \times 10^{-7}$                   | 1.19        | $6.27 \times 10^{-1}$                   |            |                   |
|                                | $1 \times 10^{-8}$                   | 1.46        | $3.29 \times 10^{-1}$                   |            |                   |
| <b>Brain - Hypothalamus</b>    | <b><math>1 \times 10^{-5}</math></b> | <b>2.27</b> | <b><math>9.38 \times 10^{-4}</math></b> | <b>108</b> | <b>251,506</b>    |
|                                | $1 \times 10^{-6}$                   | 1.72        | $9.68 \times 10^{-2}$                   |            |                   |
|                                | $1 \times 10^{-7}$                   | 1.64        | $1.93 \times 10^{-1}$                   |            |                   |
|                                | $1 \times 10^{-8}$                   | 1.64        | $2.55 \times 10^{-1}$                   |            |                   |
| Ovary                          | $1 \times 10^{-5}$                   | 1.78        | $2.05 \times 10^{-2}$                   | 122        | 292,461           |
|                                | $1 \times 10^{-6}$                   | 1.51        | $1.88 \times 10^{-1}$                   |            |                   |
|                                | $1 \times 10^{-7}$                   | 1.11        | $8.02 \times 10^{-1}$                   |            |                   |
|                                | $1 \times 10^{-8}$                   | 1.06        | $8.96 \times 10^{-1}$                   |            |                   |
| Testis                         | $1 \times 10^{-5}$                   | 0.85        | $3.90 \times 10^{-1}$                   | 225        | 1,358,512         |
|                                | $1 \times 10^{-6}$                   | 0.74        | $1.82 \times 10^{-1}$                   |            |                   |
|                                | $1 \times 10^{-7}$                   | 0.83        | $4.52 \times 10^{-1}$                   |            |                   |
|                                | $1 \times 10^{-8}$                   | 0.81        | $4.62 \times 10^{-1}$                   |            |                   |
| <b>Airway Epithelial Cells</b> | <b><math>1 \times 10^{-5}</math></b> | <b>3.01</b> | <b><math>2.05 \times 10^{-4}</math></b> | <b>104</b> | <b>185,407</b>    |
|                                | <b><math>1 \times 10^{-6}</math></b> | <b>2.89</b> | <b><math>3.89 \times 10^{-3}</math></b> |            |                   |

|                    |             |                       |
|--------------------|-------------|-----------------------|
| $1 \times 10^{-7}$ | <b>3.05</b> | $7.68 \times 10^{-3}$ |
| $1 \times 10^{-8}$ | 2.41        | $1.01 \times 10^{-1}$ |

---

405

#### 406 **Molecular QTL co-localizations with adult onset and childhood onset asthma loci**

407 Integrating molecular QTLs with GWAS data is a powerful way to identify functional variants  
408 that may ultimately influence disease risk [44, 45] and to assign function to known disease-  
409 associated variants. Co-localization approaches directly test whether the same genetic variant is  
410 underlying associations between two or more traits (e.g., gene expression and asthma), providing  
411 clues to causal disease pathways. We hypothesized that integrating molecular QTLs from RV-  
412 and vehicle-exposed epithelial cells with results of GWASs for adult onset and childhood onset  
413 asthma would reveal genetic and epigenetic mechanisms that modulate risk for childhood and/or  
414 adult onset asthma.

415 To test this hypothesis, we extracted summary statistics from large GWASs of adult onset  
416 asthma and childhood onset asthma [1], and tested each for co-localization with genetic variants  
417 associated with gene expression, DNA methylation, and asthma, using *moloc*, a Bayesian  
418 statistical approach that allows integration and co-localization of more than two molecular traits  
419 [13]. We performed four separate co-localization tests for each treatment conditions with each of  
420 the GWASs. Each analysis provided three possible configurations in which a variant is co-  
421 localized between the GWAS and QTLs: eQTL-GWAS pairs, meQTL-GWAS pairs, eQTL-  
422 meQTL-GWAS triplets. Estimates of a posterior probability of association (PPA) is provided,  
423 reflecting the evidence for a colocalized SNP being causal for the associations in the GWAS and  
424 for the corresponding eQTL and/or meQTL.

425 Using this approach, we found evidence for a total of 19 unique multiple trait co-  
426 localizations (Table 3). A single meQTL-GWAS pair was co-localized in both the adult onset

427 and childhood onset asthma GWASs. An additional 18 co-localizations were detected only in the  
428 childhood onset asthma GWAS, including a single eQTL-meQTL-GWAS triplet associated with  
429 the *ERBB2* gene, three eQTL-GWAS pairs associated with three genes (*FLG*, *FLG-AS1*,  
430 *ORMDL3*), and 15 meQTL-GWAS pairs associated with 11 CpG sites (Table 3; Table S2). No  
431 co-localizations were specific to the adult onset asthma GWAS. Among the co-localized eGenes,  
432 based on previous studies, *FLG* was predicted to have decreased expression of in childhood  
433 onset asthma [46], *ERBB2* was predicted to have decreased expression of in severe asthma [47],  
434 and *ORMDL3* was predicted to have increased expression (Table S3) [48]. The larger number of  
435 co-localizations for childhood onset asthma relative to adult onset asthma is consistent both with  
436 the previous observation that genes at the childhood onset asthma loci were most highly  
437 expressed in skin, an epithelial cell type [1] and with the enrichment of childhood onset asthma  
438 GWAS SNPs among epithelial cell eQTLs described above.  
439

**Table 3.** Number of QTL-GWAS pairs or triplets with evidence of co-localization ( $PPA \geq 0.70$ ). The one meQTL-GWAS pair in the adult onset asthma GWAS is also among the 15 meQTL-GWAS pairs in the childhood onset GWAS.

| GWAS                   | eQTL-meQTL-GWAS | eQTL-GWAS | meQTL-GWAS |
|------------------------|-----------------|-----------|------------|
| Adult onset asthma     | 0               | 0         | 1          |
| Childhood onset asthma | 1               | 3         | 15         |

PPA  $\geq$  0.70

440  
441 The significance threshold ( $p < 5 \times 10^{-8}$ ) required to control the false discovery rate in  
442 GWASs likely excludes many true associations that do not reach this stringent cutoff. We and  
443 others have suggested that these SNPs, i.e., the mid hanging fruit [49], may be environment- or  
444 context-specific associations that are missed in GWASs that typically do not control for either  
445 [50, 51]. Notably, 10 of the 19 SNPs associated with co-localizations in the childhood onset

446 asthma GWAS did not reach genome-wide significance in the GWAS. These results therefore  
447 provided functional inferences both for variants that were significant in a GWAS at known  
448 asthma loci and for variants that did not meet strict criteria for significance in the GWAS,  
449 thereby facilitating prioritization of variants among the mid-hanging fruit [49]. Two examples of  
450 co-localizations with prominent asthma-associated loci are described in the following sections.

451

#### 452 **meCpGs at *TSLP* co-localize with an asthma risk variant**

453 To more deeply characterize the co-localizations, we first focused on the only meQTL-GWAS  
454 pair in both the adult onset and childhood onset asthma GWASs. This pair included an intergenic  
455 SNP (rs1837253) located 5.7 kb upstream from the transcriptional start site (TSS) of the *TSLP*  
456 gene on chromosome 5q22, encoding an epithelial cell cytokine that plays a key role in the  
457 inflammatory response in asthma and other allergic diseases [52]. rs1837253 co-localized with a  
458 single meQTL (cg15557878) in both the adult onset ( $p_{\text{GWAS}} = 2.77 \times 10^{-13}$ ) and childhood onset  
459 ( $p_{\text{GWAS}} = 2.33 \times 10^{-27}$ ) asthma GWASs. The meCpG is located in the first (untranslated) exon (5'  
460 UTR) of the *TSLP* gene (Fig. 2), a region characterized as a promoter in normal human  
461 epidermal keratinocyte cells (NHEK; ROADMAP). In fact, rs1837253 was the sentinel SNP at  
462 this locus in GWASs of asthma (e.g. [1, 53]) and of moderate-to-severe asthma [54]. In our  
463 study, the rs1837253-C asthma risk allele was associated with hypermethylation in primary  
464 cultured AECs at cg15557878 (Fig. 2), but was not associated with the expression of *TSLP* in  
465 either treatment condition (not shown).

466 Previous studies have shown *TSLP* to be a methylation-sensitive gene and that  
467 hypomethylation at its promoter is associated with atopic dermatitis (AD) and prenatal tobacco  
468 smoke exposure [55, 56]. Another study showed that the rs1837253-CC genotype was associated

469 with increased excretion of TSLP in cultured AECs after exposure to polyI:C (a dsRNA  
470 surrogate of viral stimulation) [57]. Neither finding could be addressed in our study. Moreover,  
471 we were unable to identify any SNPs in LD with rs1837253 ( $\pm 50$  kb) in either European or  
472 African American ( $r^2 < 0.12$ ) 1000Genomes reference panels, implying that this SNP may  
473 indeed be the causal SNP at this locus. Our results further suggest that DNA methylation levels  
474 in AECs may underlie this effect.

475

#### 476 **Multi-trait co-localizations of molecular QTLs and asthma risk at the 17q12-21 asthma** 477 **locus**

478 To further explore the possibility that some mechanisms of asthma risk are exposure-specific, we  
479 focused on the co-localizations of eQTLs and meQTLs with asthma-associated SNPs at the  
480 17q12-21 (17q) locus, the most replicated locus for childhood onset asthma (reviewed in [2]).  
481 This locus is characterized by high LD across a core region of 150 kb, encoding at least 4 genes  
482 (including *ORMDL3* and *GSDMB*). SNPs extending both proximal (including *PGAP3* and  
483 *ERBB2*) and distal (including *GSDMA*) to the core region show less LD with those in the core  
484 region and have been implicated as potentially independent asthma risk loci. Previous studies  
485 have shown that SNPs at this extended locus are eQTLs for at least four genes (*ORMDL3*,  
486 *GSDMB*, *GSDMA*, *PGAP3*) in blood and/or lung cells [2] and that genetic variants at this  
487 childhood onset asthma locus are also strongly associated with early life wheezing illness [58,  
488 59], particularly RV-associated wheezing illness [60].

489 We identified six co-localizations at the extended 17q locus of molecular QTLs that were  
490 specific to childhood onset asthma GWAS SNPs. Among these co-localizations, one eQTL-  
491 GWAS pair with rs12603332 and expression of *ORMDL3* was only in vehicle-treated cells

492 (PPA $\geq$ 0.70; Fig. 3A-B). The co-localized SNP (rs12603332) is in LD ( $r^2 > 0.74$  in 1000 Genomes  
493 European reference panel) with other previously reported asthma-associated GWAS SNPs in this  
494 region, including some that were reported as eQTLs for *ORMDL3* and *GSDMB*, primarily in  
495 blood immune cells. However, in contrast to studies in *ex vivo* upper AECs [61], none of the  
496 SNPs were eQTLs for *GSDMB* in our *in vitro* culture model. That the co-localization with  
497 rs12603332 and *ORMDL3* expression was only significant in vehicle treated cells reflects the  
498 blunting of the eQTL effects (Fig. 3B), and possibly the overall decreased expression of  
499 *ORMDL3* (Fig. 3C), in RV-treated cells.

500 We also detected three meQTL-GWAS pairs among the six co-localizations at the 17q  
501 locus that were associated with two meCpGs (cg21230266, cg17401724) and three SNPs at the  
502 distal end of (rs4239225, rs3859191) and beyond (rs66826786) the extended locus near *GSDMA*,  
503 where there is some reduction of LD with SNPs in the core region (Fig. 3D-F). One of these  
504 CpGs was located in an intron (cg21230266) of *GSDMA* in regions characterized by ROADMAP  
505 as enhancers in NHEK cells. SNPs in modest to perfect LD ( $r^2_{\text{range}} = 0.46 - 1.00$ ; 1000 Genomes  
506 European panel) with these co-localizations (rs4239225, rs3859191) were described in previous  
507 studies as an independent GWAS signal for asthma (rs3894194) or an eQTL for *GSDMA*  
508 (rs3859192) [6, 62, 63]. These three meQTL-GWAS co-localizations were detected only in the  
509 RV-treated cells, although the meQTL signal for each of the three co-localizations was also  
510 detected in the vehicle treatment, likely due to decreased power to co-localize these meQTLs  
511 from the vehicle-treated cells. Additionally, there were no statistically significant differences in  
512 DNA methylation levels observed between the vehicle and RV treatments (Fig. 3F).

513 The one eQTL-meQTL-GWAS triplet detected in our study at the 17q locus (Fig. 4A,  
514 upper panel. The co-localization included an eQTL for *ERBB2*, at the proximal end of the locus



515 and more than 361 kb from the co-localized asthma risk variant in an intron of *MED24*  
516 (rs66826786) and the co-localized meCpG (cg17401724) at the distal end of the locus (Fig. 3A,  
517 middle panel), . *MED24* is beyond the extended 17q12-21 locus as previously defined [2] in a  
518 region characterized by ROADMAP as both an enhancer and TSS in NHEKs. The eQTL for  
519 *ERBB2* is observed only after exposure to RV (Fig. 3A middle and lower panels), though the  
520 meQTL associated with this triplet was present in both vehicle and RV treatment conditions (Fig.  
521 3B upper and lower panels, respectively). The asthma risk allele, rs66826786-T, was associated  
522 with decreased DNA methylation of cg17401724 in both conditions but with decreased *ERBB2*  
523 expression only in RV-treated cells. Overall, *ERBB2* expression decreased in response to RV  
524 exposure in AECs (Fig. 3D). The 361 kb distance between the promoter of *ERBB2* and its eSNP  
525 (rs66826786) suggests long-range interaction between *ERBB2* and the region harboring  
526 cg17401724 and rs66826786. The fact that the eQTL is observed only after RV infection, further  
527 suggests either that infection with RV triggers this long-range interaction in AECs via chromatin  
528 looping between these loci, or that RV infection results in the recruitment of negative  
529 transcription factors in this region that is already epigenetically poised. In fact, the observation  
530 that the meQTL for cg17401724 is observed in both conditions indeed suggests an epigenetically  
531 poised chromatin state at the distal end that directly affects transcription of *ERBB2* at the  
532 proximal end of the locus after exposure to RV, and possibly to other viruses.

533

#### 534 **Mendelian randomization of multi-trait co-localized triplets**

535 Co-localization analyses reveal genetic variants that are associated with both asthma and  
536 molecular traits (gene expression and/or DNA methylation) but the question of causality between  
537 the molecular traits remains unanswered. To infer causal relationships between DNA

538 methylation and gene expression on asthma risk, we performed Mendelian randomization (MR),  
539 a method in which genetic variation associated with modifiable exposure patterns (i.e. DNA  
540 methylation) can be used as an instrumental variable to estimate the causal influence of an  
541 exposure on an outcome (i.e. DNA methylation on gene expression) [64]. Specifically, we  
542 applied a two-stage least squares regression (2SLS; see Methods) regression to estimate the  
543 effects of DNA methylation (exposure) on gene expression (outcome) in each treatment  
544 condition, and used the QTL SNP (rs66826786) in the co-localized triplets at 17q as the genetic  
545 instrument (see Methods). In this way, we are able to estimate whether the effect of the asthma  
546 risk variant on gene expression levels is mediated by DNA methylation.

547 MR suggested a causal relationship between methylation and gene expression in RV-  
548 treated cells for the co-localized triplet, indicating that the genotype effect at rs66826786 on  
549 expression of *ERBB2* is mediated by methylation at the meCpG (Table 4). The contribution of  
550 the meCpG on *ERBB2* gene expression was only detected in RV-treated cells (P-value<1x10<sup>-10</sup>)  
551 while no evidence was detected in vehicle-treated cells (P-value=0.81), further suggesting a gene  
552 regulatory mechanism that is triggered after exposure to RV. The MR result provides orthogonal  
553 evidence for the co-localization of this triplet and novel evidence for causal inference with  
554 respect to the co-localized traits (DNA methylation, gene expression). These data also reinforce  
555 arguments for epigenetic mechanisms modifying gene expression, and potentially disease risk, in  
556 response to environmental exposures [65, 66].

557

## 558 **Discussion**

559 One of the major challenges of complex disease genetics is to uncover molecular mechanisms of  
560 pathogenesis and to understand how genetic and environmental factors interact to influence risks  
561 for disease. While GWASs have identified thousands of SNPs associated with disease  
562 phenotypes, interpretation and downstream follow-up studies of GWAS results have been  
563 limited. Cell models can advance our understanding of disease pathobiology through  
564 experimental testing of disease mechanisms in a controlled environment. In this multi-omics  
565 study, we leveraged an airway epithelial cell model of microbial response to identify potentially  
566 functional variants, some of which have context-specific effects on transcriptional and epigenetic  
567 responses, and molecular mechanisms of disease. We show that asthma GWAS SNPs were  
568 specifically enriched among molecular QTLs in airway epithelial cells compared to SNPs from  
569 other GWASs, and among AEC eQTLs compared to eQTLs from other tissues. Finally, SNPs  
570 that were molecular QTLs in our study co-localized with asthma GWAS SNPs, identifying 18  
571 unique co-localizations that included both known asthma loci (e.g., 17q12-21 and *TSLP*) and loci  
572 that did not meet stringent criteria for genome-wide significance in the GWASs (Table S2).

573         The results of enrichment analyses further highlighted the important role of airway  
574 epithelium in asthma GWAS discoveries. The enrichment of childhood onset asthma GWAS  
575 SNPs among epithelial eQTLs is particularly noteworthy, as it not only supports the tissue  
576 specificity of our model but also identified genomic loci with molecular mechanisms that have  
577 not been described prior to our study. These results are also consistent with previous studies  
578 suggesting that functional variants from disease-relevant tissues are more enriched among  
579 GWAS loci for those diseases [4, 41, 42]. The more modest enrichment of adult onset asthma  
580 GWAS SNPs among epithelial eQTLs may be due to the overall smaller effect sizes of SNPs at  
581 adult onset asthma loci compared to childhood onset asthma loci, to the less important role of

582 epithelial cells in the pathophysiology of adult onset asthma, or to the greater heterogeneity and  
583 lesser heritability of adult onset asthma [1]. Other differences between the adult onset and  
584 childhood onset asthma GWASs were observed. For example, only a single co-localization was  
585 detected with adult onset asthma GWAS SNPs, compared to 19 with childhood onset asthma  
586 GWAS SNPs. None of the co-localizations in the adult onset GWAS included an eQTL  
587 compared to four childhood onset co-localizations with eQTLs, and the one meQTL-GWAS pair  
588 in the adult onset asthma GWAS was also present in the childhood onset asthma. These  
589 differences were additionally surprising because although there were 2.5-times the number of  
590 loci associated with childhood onset asthma compared to adult onset asthma in the GWASs [1],  
591 there were nearly 20-times more co-localizations in the childhood onset compared to the adult  
592 onset GWAS (19 vs. 1, respectively). These observations likely reflect the more important role  
593 of gene regulation and dysregulation in airway epithelium in the etiology of childhood onset  
594 asthma compared to adult onset asthma [17, 18]. Focusing on other asthma relevant tissues (e.g.,  
595 lung tissue) or cells (e.g., immune cells) might reveal additional novel molecular mechanisms  
596 and differences between childhood onset and adult onset asthma.

597         Our study provides mechanistic evidence for associations between GWAS SNPs and  
598 asthma at two important loci: the *TSLP* and 17q12-21 loci. Co-localizations of the asthma  
599 associated SNP rs1837253 with DNA methylation levels in the *TSLP* gene suggest an epigenetic  
600 mechanism of disease that contributes to both adult and childhood onset asthma, and is robust to  
601 RV versus vehicle treatment. Associations of this SNP with asthma have been highly replicated  
602 in GWASs, and *TSLP* is recognized as having an important role in asthma pathogenesis through  
603 its broad effects on innate and adaptive immune cells promoting Th2 inflammation [67]. Our  
604 data further show that the effect of rs1837253 genotype on risk for asthma may be mediated

605 through DNA methylation levels at CpG sites in the untranslated first exon of the *TSLP* gene in  
606 AECs. Finally, the lack of LD with other SNPs in a 100 kb window suggests that rs1837253 may  
607 be the causal asthma SNP at this important locus.

608         Since its discovery over a decade ago, the 17q12-21 locus has been an important focus of  
609 asthma research. Several studies have revealed the complex nature of this locus including the  
610 differences in LD structure across populations, and contrasting gene expression patterns and  
611 eQTLs at this locus in asthma-relevant cell types (reviewed in [2, 61]). In our study, using an  
612 airway epithelium cell model of RV infection, additional dimensions of complexity at this locus  
613 were revealed. For example, genes in the core region have been considered the most likely  
614 candidate genes mediating effects of genetic variation on risk of childhood onset asthma [61].  
615 However, our study further shows that genes at both the proximal and distal ends of this locus,  
616 *ERBB2* and *GSDMA*, respectively, may contribute to asthma risk in the presence of RV  
617 infection. Mendelian randomization revealed a novel epigenetic mechanism through which a  
618 SNP at the distal boundary of the locus was associated with expression of *ERBB2* at the proximal  
619 boundary of the locus, only after exposure to RV. The eQTL effect on *ERBB2* expression in RV-  
620 treated cells was mediated through differential methylation of a CpG site at the distal locus,  
621 which was present in both treatment conditions. Previous studies have shown that variation at the  
622 17q core locus confers risk to asthma only among children with wheezing illness in early life  
623 [68], particularly with RV-associated wheezing [59, 60]. Our study further connected RV  
624 infection and genotype at this locus to the *ERBB2* gene for the first time, as well as to an  
625 interaction between genetic and methylation variation at the distal end of the locus with the  
626 expression of *ERBB2* at the proximal end of the locus in RV infected epithelial cells. The SNP  
627 that is the eQTL for *ERBB2* in RV infected epithelial cells was associated with childhood onset

628 asthma ( $p_{\text{GWAS}} = 6.43 \times 10^{-26}$  [1]), directly connecting the eQTL for *ERBB2* in RV-treated cells to  
629 asthma risk. The asthma associated allele, rs66826786-T, was associated with decreased  
630 expression of *ERBB2* after RV infection in our study (Fig. 3A), consistent with results of a study  
631 of 155 asthma cases and controls reporting an inverse correlation between *ERBB2* expression in  
632 *ex vivo* lower AECs and asthma severity [47]. These combined data suggest that decreased  
633 expression of *ERBB2* associated with asthma severity may be modulated by RV, the most  
634 common trigger of asthma exacerbations, via epigenetic mechanisms involving DNA  
635 methylation and long-range chromatin looping between the proximal and distal ends of this  
636 important locus. In addition, meQTLs in *GSDMA*, at the proximal end of the locus, co-localized  
637 with GWAS SNPs in RV-treated cells only. Together, these findings further highlight the  
638 importance of RV exposure at this prominent asthma risk locus and provide mechanistic  
639 evidence for a genotype by exposure interaction, and raise the possibility that SNPs in the core  
640 region primarily confer risk for inception of early onset asthma whereas SNPs in the proximal  
641 and distal ends of the locus primarily modulate gene-environment interactions.

642 Many of the associations in GWASs that do not reach stringent criteria for genome-wide  
643 significance ( $p < 5 \times 10^{-8}$ ) may be true signals. Distinguishing true from false positive signals for  
644 variants among the mid-hanging fruit (e.g., p-values between  $10^{-5}$  and  $> 10^{-8}$ ) can be challenging.  
645 In our study, over 57% of the co-localizations were with a GWAS SNP that did not meet  
646 genome-wide significance (childhood onset asthma GWAS p-value range  $6.1 \times 10^{-7} - 1.4 \times 10^{-5}$ ;  
647 Table S2). One possibility for this is because the variants have exposure-specific, tissue-specific,  
648 or endotype-specific effects, which are heterogeneous among subjects included in GWASs.  
649 Therefore, annotating SNPs among the mid-hanging fruit for functionality provides more

650 confidence to these findings, a more complete picture of the genetic architecture of asthma, and a  
651 model for prioritizing these loci for further studies.

652 Our study has several limitations. First, the sample sizes for the eQTL and meQTL  
653 studies were smaller than the most reliable sample size recommended by *moloc* ( $n_{\min}=300$ ) [13].  
654 In such cases, *moloc* can miss true co-localizations in QTL datasets. For example, an eQTL-  
655 GWAS pair with supporting evidence may, in reality, be an eQTL-meQTL-GWAS triplet. As a  
656 result, the eQTL-GWAS and meQTL-GWAS pairs that we identified could be eQTL-meQTL-  
657 GWAS triplets that we were not powered to detect, or we may have missed other co-localizations  
658 entirely. For example, although only a single meQTL co-localized with a GWAS SNP at the  
659 *TSLP* locus, the same SNP, rs1837253, was an meQTL for three additional CpGs (Fig. S6),  
660 representing additional potential contributors to asthma disease mechanisms. Nonetheless, the 19  
661 unique co-localizations detected in our study are likely to be real, although future studies in  
662 larger samples will increase confidence in our findings. Second, we focused our studies on one  
663 cell type (upper airway sinonasal epithelium), two exposures (vehicle and RV), and one  
664 epigenetic mark (DNA methylation). It is possible that other asthma-relevant co-localizations are  
665 specific other tissues or cell types or to other exposures or culture conditions, and that additional  
666 epigenetic marks, such as those associated with chromatin accessibility, would be additionally  
667 informative. These extended studies will be necessary to validate the specificity and provide a  
668 more complete catalog of asthma-relevant co-localizations. Finally, characterizing chromatin  
669 conformational changes in AECs before and after exposure to RV will allow a direct assessment  
670 of the chromatin looping at the extended 17q12-21 locus that may occur in response to viral  
671 infection and potentially identify other context-specific interactions.

672 In summary, we identified *cis*-eQTLs and *cis*-meQTLs in an airway epithelial cell model  
673 of host cell response to RV and integrated those data with asthma GWASs to assign potential  
674 molecular mechanisms for variants associated with asthma in two large GWASs. By combining  
675 enrichment studies, co-localization analysis, and Mendelian randomization, we provide robust  
676 statistical evidence of epigenetic mechanisms in upper airway cells contributing to childhood  
677 onset asthma. We demonstrate that a multi-omics approach using a disease-relevant cell type and  
678 disease-relevant exposure allows prioritization of disease-associated variants and provides  
679 insight into potential epigenetic mechanisms of asthma pathogenesis.

680

## 681 **Acknowledgments**

682 The authors acknowledge Christine Billstrand and Raluca Nicolae for sample processing  
683 and library preparation, and study subjects for their participation. This work was supported by  
684 NIH grants U19 AI106683 and R01 HL129735. M.M.S. was supported in part by T32  
685 GM007197.

686

## 687 **References**

- 688 1. Pividori M, Schoettler N, Nicolae DL, Ober C, Im HK: **Shared and distinct genetic risk**  
689 **factors for childhood-onset and adult-onset asthma: genome-wide and**  
690 **transcriptome-wide studies.** *Lancet Respir Med* 2019, 7(6):509-522.
- 691 2. Stein MM, Thompson EE, Schoettler N, Helling BA, Magnaye KM, Stanhope C, Igartua  
692 C, Morin A, Washington C, 3rd, Nicolae D *et al*: **A decade of research on the 17q12-21**  
693 **asthma locus: Piecing together the puzzle.** *J Allergy Clin Immunol* 2018.
- 694 3. Gerasimova A, Chavez L, Li B, Seumois G, Greenbaum J, Rao A, Vijayanand P, Peters  
695 B: **Predicting cell types and genetic variations contributing to disease by combining**  
696 **GWAS and epigenetic data.** *PLoS One* 2013, 8(1):e54359.



- 697 4. Maurano MT, Humbert R, Rynes E, Thurman RE, Haugen E, Wang H, Reynolds AP,  
698 Sandstrom R, Qu H, Brody J: **Systematic localization of common disease-associated**  
699 **variation in regulatory DNA**. *Science* 2012;1222794.
- 700 5. Nicolae DL, Gamazon E, Zhang W, Duan S, Dolan ME, Cox NJ: **Trait-associated SNPs**  
701 **are more likely to be eQTLs: annotation to enhance discovery from GWAS**. *PLoS*  
702 *Genet* 2010, **6**(4):e1000888.
- 703 6. Consortium GT: **Human genomics. The Genotype-Tissue Expression (GTEx) pilot**  
704 **analysis: multitissue gene regulation in humans**. *Science* 2015, **348**(6235):648-660.
- 705 7. Consortium EP: **The ENCODE (ENCyclopedia Of DNA Elements) Project**. *Science*  
706 2004, **306**(5696):636-640.
- 707 8. Roadmap Epigenomics C, Kundaje A, Meuleman W, Ernst J, Bilenky M, Yen A, Heravi-  
708 Moussavi A, Kheradpour P, Zhang Z, Wang J *et al*: **Integrative analysis of 111**  
709 **reference human epigenomes**. *Nature* 2015, **518**(7539):317-330.
- 710 9. Ferreira MA, Vonk JM, Baurecht H, Marenholz I, Tian C, Hoffman JD, Helmer Q,  
711 Tillander A, Ullemar V, van Dongen J *et al*: **Shared genetic origin of asthma, hay fever**  
712 **and eczema elucidates allergic disease biology**. *Nat Genet* 2017, **49**(12):1752-1757.
- 713 10. Demenais F, Margaritte-Jeannin P, Barnes KC, Cookson WOC, Altmuller J, Ang W, Barr  
714 RG, Beaty TH, Becker AB, Beilby J *et al*: **Multiancestry association study identifies**  
715 **new asthma risk loci that colocalize with immune-cell enhancer marks**. *Nat Genet*  
716 2018, **50**(1):42-53.
- 717 11. Barreiro LB, Tailleux L, Pai AA, Gicquel B, Marioni JC, Gilad Y: **Deciphering the**  
718 **genetic architecture of variation in the immune response to Mycobacterium**  
719 **tuberculosis infection**. *Proc Natl Acad Sci U S A* 2012, **109**(4):1204-1209.
- 720 12. Kim-Hellmuth S, Bechheim M, Putz B, Mohammadi P, Nedelec Y, Giangreco N, Becker  
721 J, Kaiser V, Fricker N, Beier E *et al*: **Genetic regulatory effects modified by immune**  
722 **activation contribute to autoimmune disease associations**. *Nat Commun* 2017,  
723 **8**(1):266.
- 724 13. Giambartolomei C, Zhenli Liu J, Zhang W, Hauberg M, Shi H, Boocock J, Pickrell J,  
725 Jaffe AE, CommonMind C, Pasaniuc B *et al*: **A Bayesian Framework for Multiple**  
726 **Trait Colo-calization from Summary Association Statistics**. *Bioinformatics* 2018.
- 727 14. Jackson DJ, Gangnon RE, Evans MD, Roberg KA, Anderson EL, Pappas TE, Printz MC,  
728 Lee WM, Shult PA, Reisdorf E *et al*: **Wheezing rhinovirus illnesses in early life**

- 729            **predict asthma development in high-risk children.** *Am J Respir Crit Care Med* 2008,  
730            **178(7):667-672.**
- 731    15.    Johnston SL, Pattemore PK, Sanderson G, Smith S, Lampe F, Josephs L, Symington P,  
732            O'Toole S, Myint SH, Tyrrell DA *et al*: **Community study of role of viral infections in**  
733            **exacerbations of asthma in 9-11 year old children.** *BMJ* 1995, **310(6989):1225-1229.**
- 734    16.    Busse WW, Lemanske RF, Jr., Gern JE: **Role of viral respiratory infections in asthma**  
735            **and asthma exacerbations.** *Lancet* 2010, **376(9743):826-834.**
- 736    17.    Busse WW: **The atopic march: Fact or folklore?** *Ann Allergy Asthma Immunol* 2018,  
737            **120(2):116-118.**
- 738    18.    Han H, Roan F, Ziegler SF: **The atopic march: current insights into skin barrier**  
739            **dysfunction and epithelial cell-derived cytokines.** *Immunol Rev* 2017, **278(1):116-130.**
- 740    19.    Delaneau O, Zagury JF, Marchini J: **Improved whole-chromosome phasing for disease**  
741            **and population genetic studies.** *Nat Methods* 2013, **10(1):5-6.**
- 742    20.    Howie B, Marchini J, Stephens M: **Genotype imputation with thousands of genomes.**  
743            *G3 (Bethesda)* 2011, **1(6):457-470.**
- 744    21.    Freeman C, Marchini J: **GTOOL: A program for transforming sets of genotype data**  
745            **for use with the programs SNPTEST and IMPUTE, Oxford, UK.** *GTOOL: A*  
746            *program for transforming sets of genotype data for use with the programs SNPTEST and*  
747            *IMPUTE, Oxford, UK.*
- 748    22.    Jun G, Flickinger M, Hetrick KN, Romm JM, Doheny KF, Abecasis GR, Boehnke M,  
749            Kang HM: **Detecting and estimating contamination of human DNA samples in**  
750            **sequencing and array-based genotype data.** *Am J Hum Genet* 2012, **91(5):839-848.**
- 751    23.    Dobin A, Gingeras TR: **Mapping RNA-seq Reads with STAR.** *Curr Protoc*  
752            *Bioinformatics* 2015, **51**:11 14 11-19.
- 753    24.    Law CW, Chen Y, Genome ... SW: **Voom: precision weights unlock linear model**  
754            **analysis tools for RNA-seq read counts.** *Voom: precision weights unlock linear model*  
755            *analysis tools for RNA-seq read counts* 2014.
- 756    25.    Leek JT, Johnson WE, Parker HS, Jaffe AE, Storey JD: **The sva package for removing**  
757            **batch effects and other unwanted variation in high-throughput experiments.**  
758            *Bioinformatics* 2012, **28(6):882-883.**

- 759 26. Ritchie ME, Phipson B, Wu D, Hu Y, Law CW, Shi W, Smyth GK: **limma powers**  
760 **differential expression analyses for RNA-sequencing and microarray studies.**  
761 *Nucleic Acids Res* 2015, **43**(7):e47.
- 762 27. Aryee MJ, Jaffe AE, Corrada-Bravo H, Ladd-Acosta C, Feinberg AP, Hansen KD,  
763 Irizarry RA: **Minfi: a flexible and comprehensive Bioconductor package for the**  
764 **analysis of Infinium DNA methylation microarrays.** *Bioinformatics* 2014,  
765 **30**(10):1363-1369.
- 766 28. Maksimovic J, Gordon L: **SWAN: Subset-quantile within array normalization for**  
767 **illumina infinium HumanMethylation450 BeadChips.** *SWAN: Subset-quantile within*  
768 *array normalization for illumina infinium HumanMethylation450 BeadChips* 2012.
- 769 29. Peters TJ, Buckley MJ: **De novo identification of differentially methylated regions in**  
770 **the human genome.** *De novo identification of differentially methylated regions in the*  
771 *human genome* 2015.
- 772 30. Ongen H, Buil A, Brown AA, Dermitzakis ET, Delaneau O: **Fast and efficient QTL**  
773 **mapper for thousands of molecular phenotypes.** *Bioinformatics* 2016, **32**(10):1479-  
774 1485.
- 775 31. Delaneau O, Ongen H, Brown AA, Fort A, Panousis NI, Dermitzakis ET: **A complete**  
776 **tool set for molecular QTL discovery and analysis.** *Nat Commun* 2017, **8**:15452.
- 777 32. Urrut SM, Wang G, Carbonetto P, Stephens M: **Flexible statistical methods for**  
778 **estimating and testing effects in genomic studies with multiple conditions.** *Nat Genet*  
779 2019, **51**(1):187-195.
- 780 33. Iotchkova V, Ritchie GRS, Geihs M, Morganella S, Min JL, Walter K, Timpson NJ,  
781 Consortium UK, Dunham I, Birney E *et al*: **GARFIELD classifies disease-relevant**  
782 **genomic features through integration of functional annotations with association**  
783 **signals.** *Nat Genet* 2019, **51**(2):343-353.
- 784 34. Jansen IE, Savage JE, Watanabe K, Bryois J, Williams DM, Steinberg S, Sealock J,  
785 Karlsson IK, Hagg S, Athanasiu L *et al*: **Genome-wide meta-analysis identifies new**  
786 **loci and functional pathways influencing Alzheimer's disease risk.** *Nat Genet* 2019,  
787 **51**(3):404-413.
- 788 35. Nielsen JB, Thorolfsson RB, Fritsche LG, Zhou W, Skov MW, Graham SE, Herron TJ,  
789 McCarthy S, Schmidt EM, Sveinbjornsson G *et al*: **Biobank-driven genomic discovery**  
790 **yields new insight into atrial fibrillation biology.** *Nat Genet* 2018, **50**(9):1234-1239.

- 791 36. Wood AR, Esko T, Yang J, Vedantam S, Pers TH, Gustafsson S, Chu AY, Estrada K,  
792 Luan J, Kutalik Z *et al*: **Defining the role of common variation in the genomic and**  
793 **biological architecture of adult human height**. *Nat Genet* 2014, **46**(11):1173-1186.
- 794 37. Luciano M, Hagenaars SP, Davies G, Hill WD, Clarke TK, Shirali M, Harris SE, Marioni  
795 RE, Liewald DC, Fawns-Ritchie C *et al*: **Association analysis in over 329,000**  
796 **individuals identifies 116 independent variants influencing neuroticism**. *Nat Genet*  
797 2018, **50**(1):6-11.
- 798 38. Nicodemus-Johnson J, Myers RA, Sakabe NJ, Sobreira DR, Hogarth DK, Naureckas ET,  
799 Sperling AI, Solway J, White SR, Nobrega MA *et al*: **DNA methylation in lung cells is**  
800 **associated with asthma endotypes and genetic risk**. *JCI Insight* 2016, **1**(20):e90151.
- 801 39. Stephens M: **False discovery rates: a new deal**. *Biostatistics* 2017, **18**(2):275-294.
- 802 40. Gulko B, Hubisz MJ, Gronau I, Siepel A: **A method for calculating probabilities of**  
803 **fitness consequences for point mutations across the human genome**. *Nat Genet* 2015,  
804 **47**(3):276-283.
- 805 41. Consortium GT, Laboratory DA, Coordinating Center -Analysis Working G, Statistical  
806 Methods groups-Analysis Working G, Enhancing Gg, Fund NIHC, Nih/Nci, Nih/Nhgri,  
807 Nih/Nimh, Nih/Nida *et al*: **Genetic effects on gene expression across human tissues**.  
808 *Nature* 2017, **550**(7675):204-213.
- 809 42. Finucane HK, Bulik-Sullivan B, Gusev A, Trynka G, Reshef Y, Loh PR, Anttila V, Xu  
810 H, Zang C, Farh K *et al*: **Partitioning heritability by functional annotation using**  
811 **genome-wide association summary statistics**. *Nat Genet* 2015, **47**(11):1228-1235.
- 812 43. Consortium GT: **The Genotype-Tissue Expression (GTEx) project**. *Nat Genet* 2013,  
813 **45**(6):580-585.
- 814 44. Giambartolomei C, Vukcevic D, Schadt EE, Franke L, Hingorani AD, Wallace C,  
815 Plagnol V: **Bayesian test for colocalisation between pairs of genetic association**  
816 **studies using summary statistics**. *PLoS Genet* 2014, **10**(5):e1004383.
- 817 45. Wen X, Pique-Regi R, Luca F: **Integrating molecular QTL data into genome-wide**  
818 **genetic association analysis: Probabilistic assessment of enrichment and**  
819 **colocalization**. *PLoS Genet* 2017, **13**(3):e1006646.
- 820 46. Sandilands A, Sutherland C, Irvine AD, McLean WH: **Filaggrin in the frontline: role in**  
821 **skin barrier function and disease**. *J Cell Sci* 2009, **122**(Pt 9):1285-1294.

- 822 47. Modena BD, Bleecker ER, Busse WW, Erzurum SC, Gaston BM, Jarjour NN, Meyers  
823 DA, Milosevic J, Tedrow JR, Wu W: **Gene expression correlated with severe asthma**  
824 **characteristics reveals heterogeneous mechanisms of severe disease.** *American*  
825 *journal of respiratory and critical care medicine* 2017, **195**(11):1449-1463.
- 826 48. Moffatt MF, Kabesch M, Liang L, Dixon AL, Strachan D, Heath S, Depner M, von Berg  
827 A, Bufe A, Rietschel E *et al*: **Genetic variants regulating ORMDL3 expression**  
828 **contribute to the risk of childhood asthma.** *Nature* 2007, **448**(7152):470-473.
- 829 49. Ober C: **Asthma Genetics in the Post-GWAS Era.** *Annals of the American Thoracic*  
830 *Society* 2016, **13 Suppl 1**(Supplement 1):90.
- 831 50. McCarthy MI, Hirschhorn JN: **Genome-wide association studies: potential next steps**  
832 **on a genetic journey.** *Human molecular genetics* 2008, **17**(R2):65.
- 833 51. Bonnelykke K, Ober C: **Leveraging gene-environment interactions and endotypes for**  
834 **asthma gene discovery.** *J Allergy Clin Immunol* 2016, **137**(3):667-679.
- 835 52. Ying S, O'Connor B, Ratoff J, Meng Q, Mallett K, Cousins D, Robinson D, Zhang G,  
836 Zhao J, Lee TH *et al*: **Thymic stromal lymphopoietin expression is increased in**  
837 **asthmatic airways and correlates with expression of Th2-attracting chemokines and**  
838 **disease severity.** *J Immunol* 2005, **174**(12):8183-8190.
- 839 53. Torgerson DG, Ampleford EJ, Chiu GY, Gauderman WJ, Gignoux CR, Graves PE,  
840 Himes BE, Levin AM, Mathias RA, Hancock DB *et al*: **Meta-analysis of genome-wide**  
841 **association studies of asthma in ethnically diverse North American populations.** *Nat*  
842 *Genet* 2011, **43**(9):887-892.
- 843 54. Shrine N, Portelli MA, John C, Soler Artigas M, Bennett N, Hall R, Lewis J, Henry AP,  
844 Billington CK, Ahmad A *et al*: **Moderate-to-severe asthma in individuals of European**  
845 **ancestry: a genome-wide association study.** *Lancet Respir Med* 2019, **7**(1):20-34.
- 846 55. Wang IJ, Chen SL, Lu TP, Chuang EY, Chen PC: **Prenatal smoke exposure, DNA**  
847 **methylation, and childhood atopic dermatitis.** *Clin Exp Allergy* 2013, **43**(5):535-543.
- 848 56. Luo Y, Zhou B, Zhao M, Tang J, Lu Q: **Promoter demethylation contributes to TSLP**  
849 **overexpression in skin lesions of patients with atopic dermatitis.** *Clin Exp Dermatol*  
850 2014, **39**(1):48-53.
- 851 57. Hui CC, Yu A, Heroux D, Akhbar L, Sandford AJ, Neighbour H, Denburg JA: **Thymic**  
852 **stromal lymphopoietin (TSLP) secretion from human nasal epithelium is a function**  
853 **of TSLP genotype.** *Mucosal Immunol* 2015, **8**(5):993-999.

- 854 58. Smit LA, Bouzigon E, Pin I, Siroux V, Monier F, Aschard H, Bousquet J, Gormand F,  
855 Just J, Le Moual N *et al*: **17q21 variants modify the association between early**  
856 **respiratory infections and asthma**. *Eur Respir J* 2010, **36**(1):57-64.
- 857 59. Loss GJ, Depner M, Hose AJ, Genuneit J, Karvonen AM, Hyvarinen A, Roduit C,  
858 Kabesch M, Lauener R, Pfefferle PI *et al*: **The Early Development of Wheeze.**  
859 **Environmental Determinants and Genetic Susceptibility at 17q21**. *Am J Respir Crit*  
860 *Care Med* 2016, **193**(8):889-897.
- 861 60. Caliskan M, Bochkov YA, Kreiner-Moller E, Bonnelykke K, Stein MM, Du G, Bisgaard  
862 H, Jackson DJ, Gern JE, Lemanske RF, Jr. *et al*: **Rhinovirus wheezing illness and**  
863 **genetic risk of childhood-onset asthma**. *N Engl J Med* 2013, **368**(15):1398-1407.
- 864 61. Ober C, McKennan CG, Magnaye KM, Altman MC, Washington C, 3rd, Stanhope C,  
865 Naughton KA, Rosasco MG, Bacharier LB, Billheimer D *et al*: **Expression quantitative**  
866 **trait locus fine mapping of the 17q12-21 asthma locus in African American children:**  
867 **a genetic association and gene expression study**. *Lancet Respir Med* 2020, **8**(5):482-  
868 492.
- 869 62. Moffatt MF, Gut IG, Demenais F, Strachan DP, Bouzigon E, Heath S, von Mutius E,  
870 Farrall M, Lathrop M, Cookson W *et al*: **A large-scale, consortium-based genomewide**  
871 **association study of asthma**. *N Engl J Med* 2010, **363**(13):1211-1221.
- 872 63. Marinho S, Custovic A, Marsden P, Smith JA, Simpson A: **17q12-21 variants are**  
873 **associated with asthma and interact with active smoking in an adult population**  
874 **from the United Kingdom**. *Ann Allergy Asthma Immunol* 2012, **108**(6):402-411 e409.
- 875 64. Smith GD: **Mendelian Randomization for Strengthening Causal Inference in**  
876 **Observational Studies: Application to Gene x Environment Interactions**. *Perspect*  
877 *Psychol Sci* 2010, **5**(5):527-545.
- 878 65. Liu J, Ballaney M, Al-alem U, Quan C, Jin X, Perera F, Chen LC, Miller RL: **Combined**  
879 **inhaled diesel exhaust particles and allergen exposure alter methylation of T helper**  
880 **genes and IgE production in vivo**. *Toxicol Sci* 2008, **102**(1):76-81.
- 881 66. Clifford RL, Jones MJ, MacIsaac JL, McEwen LM, Goodman SJ, Mostafavi S, Kobor  
882 MS, Carlsten C: **Inhalation of diesel exhaust and allergen alters human bronchial**  
883 **epithelium DNA methylation**. *J Allergy Clin Immunol* 2017, **139**(1):112-121.
- 884 67. West EE, Kashyap M, Leonard WJ: **TSLP: A Key Regulator of Asthma Pathogenesis**.  
885 *Drug Discov Today Dis Mech* 2012, **9**(3-4).



886 68. Bouzigon E, Corda E, journal ... A-H: **Effect of 17q21 variants and smoking exposure**  
887 **in early-onset asthma.** *New England journal* ... 2008.

888

889

890 **Fig. 1. Summary of molecular effects sharing across treatment conditions (lfsr<0.05).** Venn  
891 diagrams of eGenes (A) and meCpGs (B) shared between vehicle- and RV-treated airway  
892 epithelial cells. Forest plots showing examples of RV- (left) and Vehicle-specific (right) eQTLs  
893 (C) and meQTLs (D).

894

895 **Fig. 2. Co-localization of rs1837253 with DNA methylation levels for cg15557878 at TSLP.**  
896 rs1837253 (red vertical bar, upper panel)) is associated with DNA methylation levels at  
897 cg15557878 (orange vertical bar, upper panel). Box plots show DNA methylation levels (y-axes)  
898 for each meCpGs by rs1837253 genotype (x-axes) in each treatment condition (lower panel).

899

900 **Fig. 3. Co-localization pairs at the 17q asthma susceptibility locus.** Upper panel: Box plots  
901 for the co-localized *ORMDL3* eQTL in cultured airway epithelial cells treated with vehicle (A)  
902 and RV (B). The effect size of the correlation between *ORMDL3* and rs12603332 decreases after  
903 treatment with RV (FDR<0.10); and *ORMDL3* gene expression decreases after treatment with  
904 RV (C). Box plots of the cg21230266 meQTL treated with vehicle (D) and RV (E), and  
905 methylation levels at cg21230266 (F). The meQTLs and overall methylation levels are similar  
906 in vehicle and RV treatments. Lower panel: The extended 17q12-21 locus. Co-localizations are  
907 shown by the vertical colored lines; rs4239225, a SNP in LD with rs3859191 (solid turquoise  
908 lines), is also significantly correlated with DNA methylation levels at cg21230266 in vehicle and

909 RV (not shown; see Table S2). See Fig 4B for box plots of the cg17401724:rs66826786 meQTL.  
910 Solid lines indicate the position of the colocalized SNP. Dashed lines indicate the location of  
911 meCpG pairs. Traits of the same co-localization are shown in the same color. A single eQTL-  
912 GWAS pair for *ORMDL3* is shown in orange; meQTL-GWAS pairs are shown in turquoise and  
913 green.

914

915 **Fig. 4. Co-localization of rs66826786 with *ERBB2* expression and DNA methylation levels**

916 **for cg17401724. (A)** LocusZoom plots of childhood onset GWAS results at the 17q locus  
917 showing the *ERBB2* gene at the proximal (left) end of the locus and the co-localized eQTL  
918 (rs66826786) at the distal (right) end of the locus (modified from Pividori ?). The SNP  
919 (rs66826786), which colocalized with associations for childhood onset asthma, *ERBB2*  
920 expression, and DNA methylation at cg17401724, is shown as a purple diamond in each of three  
921 LocusZoom plot. Upper panel: childhood onset asthma GWAS (modified from Pividori et al.  
922 2019). Middle panel: *ERBB2* eQTLs for vehicle-treated cultured airway epithelial cells. Lower  
923 panel: *ERBB2* eQTLs for RV-treated airway epithelial cells. Boxplots for *ERBB2* gene  
924 expression by rs66826786 genotype is shown within the middle and lower LocusZoom plots. **(B)**  
925 Boxplots for cg17401724 meQTLs in vehicle-treated (upper panel) and RV-treated (lower panel)  
926 cultured airway epithelial cells. **(C)** *ERBB2* gene expression in vehicle-treated and RV-treated  
927 cells.

928

929

930

931



## 932 **Supporting information**

933 **Fig. S1** Overview of the e/meQTL and co-localization studies in NECs treated with RV. **(A)**

934 Step-wise experimental design to identify treatment-specific e/meQTLs in NECs from 104

935 individuals: 1. NECs collected from study participants were cultured and treated with RV and a

936 vehicle for 48 hours. 2. Gene expression and DNA methylation measured in NECs from each

937 treatment condition. 3. Genotype profiling to identify genetic variation influencing gene

938 expression and DNA methylation to RV- and SA-treatment. 4. QC and analyses including

939 e/meQTL mapping, multi-trait co-localization analysis, and Mendelian randomization. **(B)**

940 Breakdown of the number of subjects for each experiment and molecular QTL mapping.

941

942 **Fig. S2 PCA and k-means clustering of genotypes.** **(A)** PCA plot of study participant's

943 genotypes (circles) projected on HapMap genotypes (squares). **(B)** Scree plot of k-means

944 clustering of ancestral PCs in which the within groups sum of squares (y-axis) is plotted against

945 the number of potential group clusters (x-axis); using the 'elbow criterion', it is determined that

946 two clusters are best representative of how many clusters study samples can be grouped into. **(C)**

947 PCA plot of study participants grouped into two cluster for genotype imputation, European (red),

948 and African American (Blue), according to the k-means clustering criterion.

949

950 **Fig. S3** PCA of gene expression in RV- and vehRV-treated epithelial cells. **(A)** PCA plot of

951 epithelial cell gene expression from 95 individuals treated with vehicle and RV before regressing

952 out covariates. **(B)** PCA plot of gene expression in vehicle- and RV-treated cells after regressing

953 out covariates. Tables showing p-values of correlation with PCs and covariates before **(C)** and

954 after **(D)** regression. **(E)** Volcano plot showing differential gene expression in response to RV  
955 treatment.

956

957 **Fig. S4** PCA of DNA methylation in vehicle- and RV-treated in cultured airway epithelial cells.

958 **(A)** PCA plot of cultured airway epithelial DNA methylation from 103 individuals treated with  
959 vehicle and RV before regressing out covariates. **(B)** PCA plot of DNA methylation in vehicle-  
960 and RV-treated cells after regressing out covariates. Tables showing p-values of correlation with  
961 PCs and covariates before **(C)** and after **(D)** regression. **(E)** Volcano plot showing differential  
962 DNA methylation in response to RV treatment.

963

964 **Fig. S5** Summary results for molecular QTL mappings. Venn diagrams of eQTLs **(A)** and  
965 meQTLs **(B)** in each condition (FDR<0.10). **(C)** Summary of eQTL and meQTL mapping results  
966 for each treatment condition. The number of SNPs associated with the gene expression of at least  
967 one gene or CpG and the number of genes or CpGs whose expression or DNA methylation levels  
968 was associated with at least one SNP.

969

970 **Fig. S6** meQTLs at rs1837253 located in the first untranslated exon of the *TSLP* gene. Box plots  
971 of three meQTLs that were identified in both the vehicle- (left) and RV-treated (right) AECs  
972 were correlated with the asthma risk variant (rs1837253) but did not show evidence of co-  
973 localization. These meQTLs may represent additional evidence of an epigenetic mechanism  
974 contributing to asthma.

975

976 **Table S1** Enrichment estimates of eQTLs for adult onset asthma GWAS SNPs from six tissues.

977 P-values that are significant after BH correction are shown in bolded type.

978

979 **Table S2** *moloc* results indicating molecular QTL-GWAS pairs and triplets

980

981 **Table S3** Adult onset and childhood onset asthma GWAS risk allele effects on gene expression

982 and DNA methylation

983

984

985

986

987

988

989

990

991

992

993

994

995

996

997

998 **Figure 1**

999

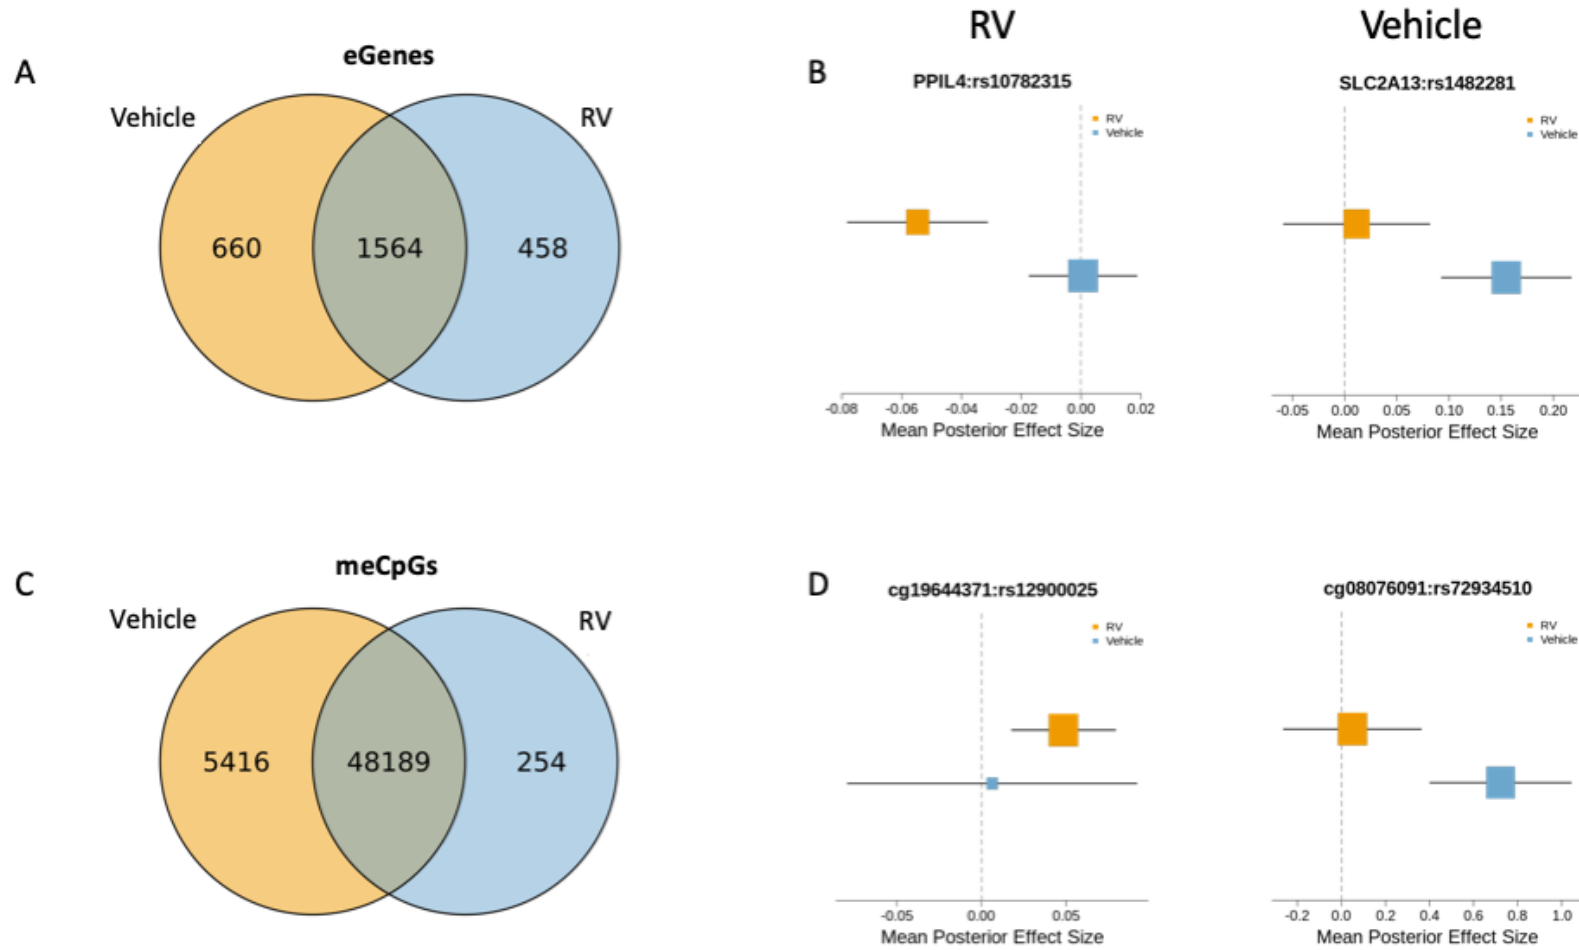

1000

1001 **Figure 2**

1002

1003

1004

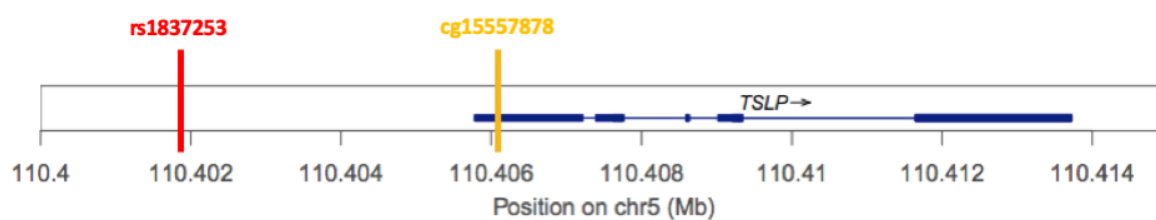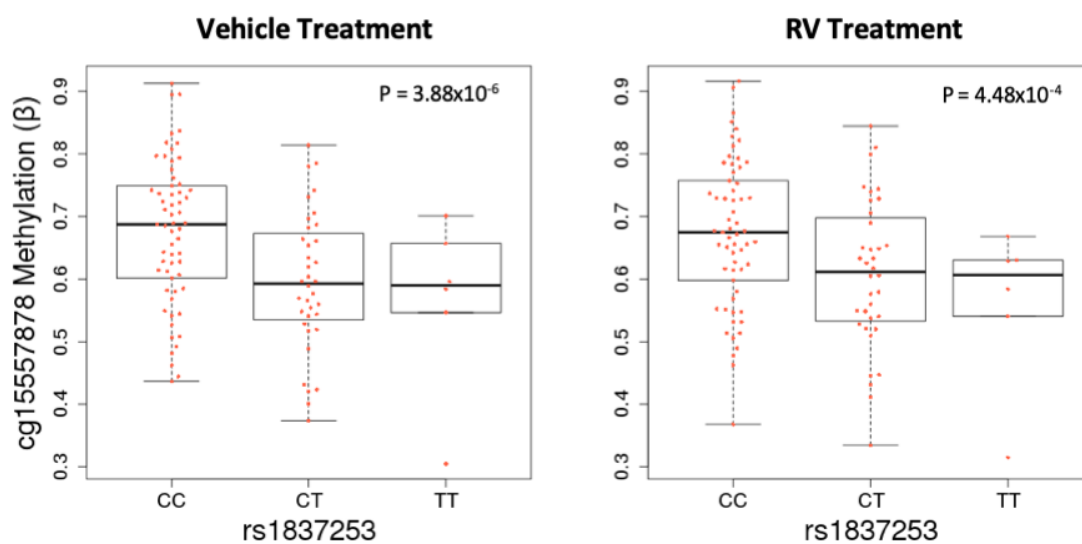

1005

1006

1007

1008

1009

1010

1011

1012

1013 **Figure 3**

1014

1015

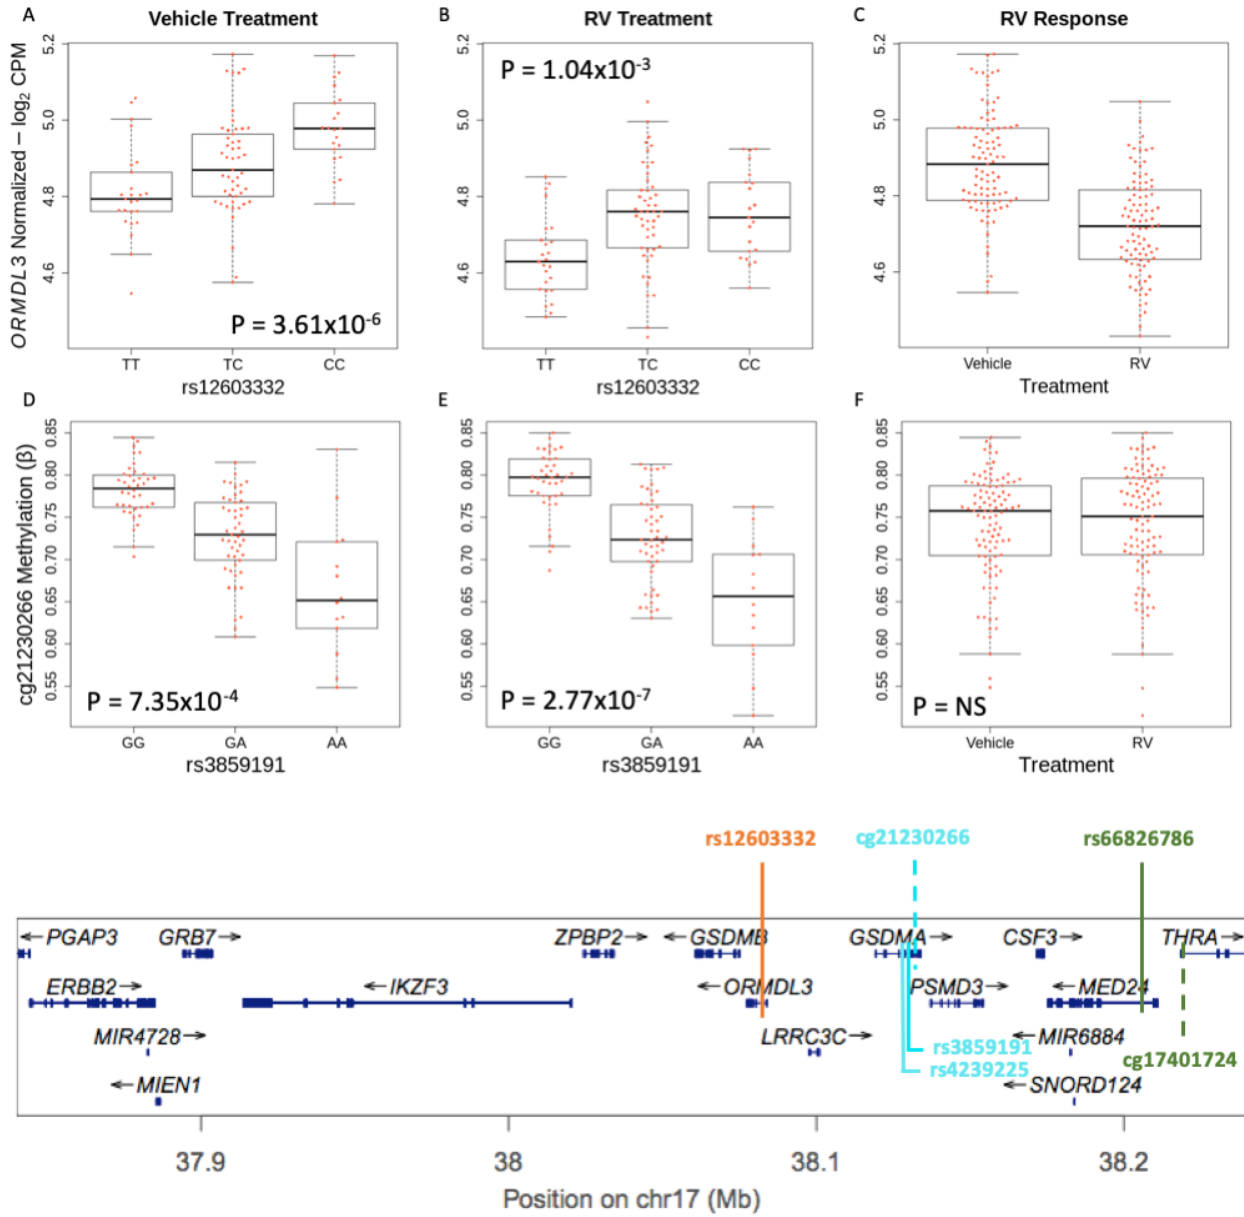

1016

1017

1018

1019

1020 **Figure 4**

**A**

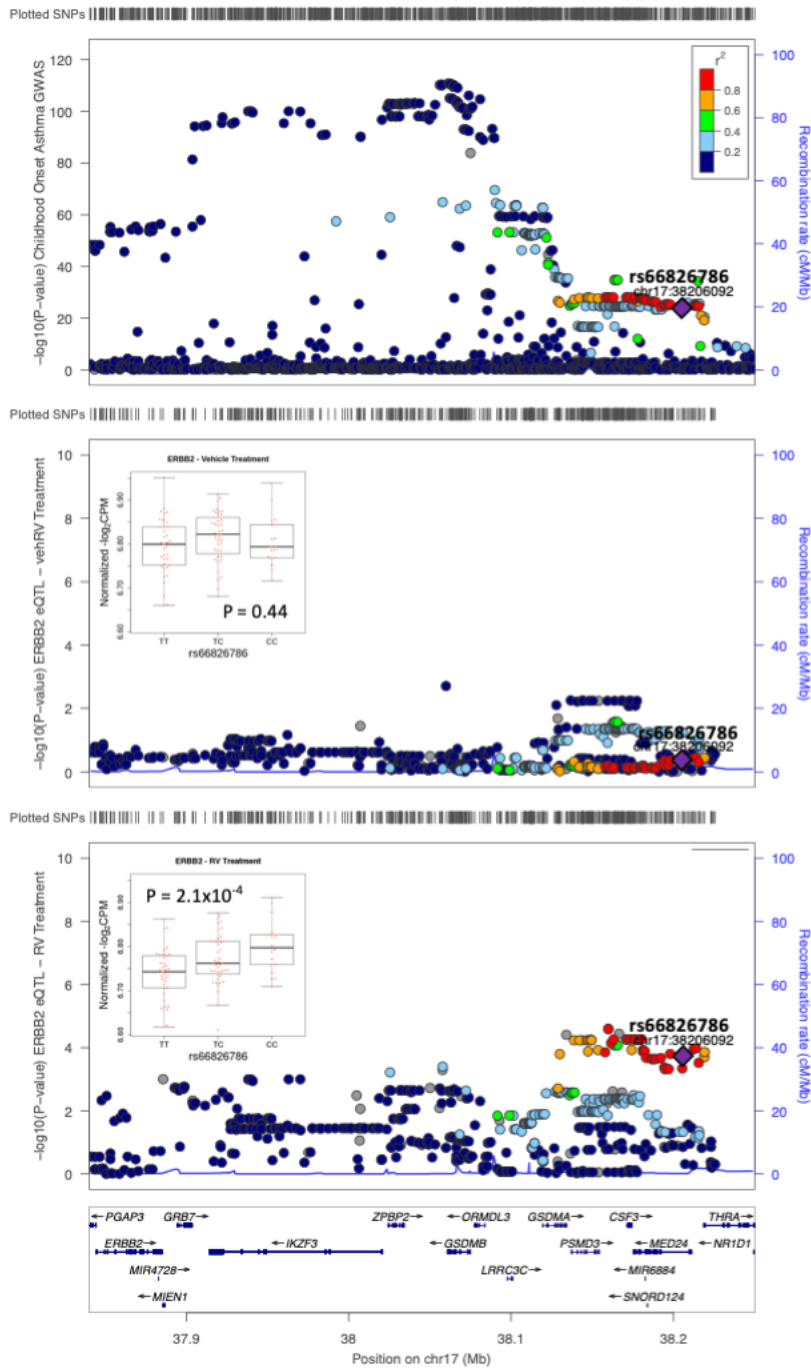

**B**

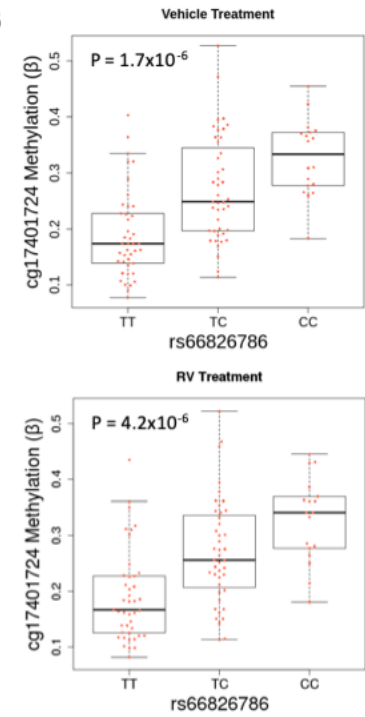

**C**

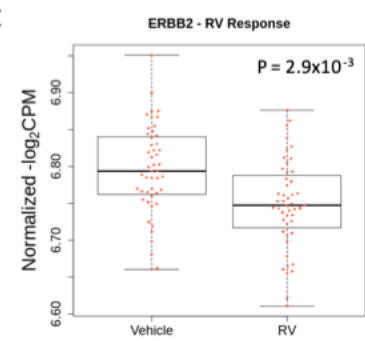

1021
